# Supplementary material for: Insights into mechanistic interpretation of crystalline-state reddish phosphorescence of non-planar π-conjugated organoboron compounds
Source: Royal Society of Chemistry journal article supplement (doi:10.1039/d4sc01184h), 2024-01-01
Supplement: d4sc01184h1.pdf [file d4sc01184h1.pdf]

## Supporting Information

### **Insights into mechanistic interpretation of crystalline-state reddish phosphorescence of non-planar $\pi$ -conjugated organoboron compounds**

Yohei Adachi,\*<sup>a</sup> Maho Kurihara,<sup>a</sup> Kohei Yamada,<sup>a</sup> Fuka Arai,<sup>a</sup> Yuto Hattori,<sup>a</sup> Keita Yamana,<sup>b</sup> Riku Kawasaki<sup>b</sup> and Joji Ohshita\*<sup>a,c</sup>

<sup>a</sup> *Smart Innovation Program, Graduate School of Advanced Science and Engineering, Hiroshima University, Higashi-Hiroshima 739-8527, Japan. E-mail: yadachi@hiroshima-u.ac.jp, jo@hiroshima-u.ac.jp*

<sup>b</sup> *Applied Chemistry Program, Graduate School of Advanced Science and Engineering, Hiroshima University, Higashi-Hiroshima 739-8527, Japan.*

<sup>c</sup> *Division of Materials Model-Based Research, Digital Monozukuri (Manufacturing) Education and Research Center, Hiroshima University, Higashi-Hiroshima, Hiroshima 739-8527, Japan.*

## **Experimental**

### *Materials*

All reactions were carried out under dry argon. For the reaction solvents, diethyl ether and toluene were purchased from Kanto Chemical Co., Ltd., distilled from calcium hydride, and stored over activated molecular sieves under argon until use. All other chemicals were purchased from FUJIFILM Wako Pure Chemical Industries, Ltd. and TCI Co., Ltd. Starting materials **6**,<sup>[S1]</sup> **1-H**,<sup>[S2]</sup> and **1-F**<sup>[S2]</sup> were prepared according to the literature procedure. Colon26 cells were kindly supplied by Prof. Nagasaki (Osaka Metropolitan University). The cells were maintained in Dulbecco's Modified Eagle Medium (Thermo Fischer Scientific, Massachusetts, USA) containing 10% fetal bovine serum (Thermo Fischer Scientific) and antibiotics (Thermo Fischer Scientific).

### *Analytical Methods*

NMR spectra were recorded on Varian System 500 and 400MR spectrometers. Abbreviations Th, Bz, Mes, Tipp, and <sup>F</sup>Mes used for the following NMR assignments stand for fused thiophene ring, fused benzene ring, mesity group, triptyl group, and 2,4,6-tris(trifluoromethylphenyl) group, respectively. High-resolution mass spectra were obtained by the direct infusion method on a Thermo Fisher Scientific LTQ Orbitrap XL spectrometer at N-BARD, Hiroshima University. UV-vis absorption spectra were measured with a Shimadzu UV-3600 Plus spectrometer. Photoluminescence (PL) spectra, phosphorescence lifetimes, and absolute PL quantum yields were measured with a HORIBA FluoroMax-4 spectrophotometer with an integrating sphere. Fluorescence lifetimes were on a HORIBA DeltaFlex modular fluorescence lifetime system, using a Nano LED pulsed diode excitation source. Variable temperature emission spectra and lifetimes were recorded on a HORIBA Fluorolog-3 spectrofluorometer and corrected for the response of the detector system.

### *DFT calculations*

The S<sub>0</sub> geometries were obtained by DFT calculations using a Gaussian 16 program at the B3LYP/6-31G(d) level of theory. The S<sub>1</sub> and T<sub>1</sub> geometries were obtained by TD-DFT calculations at the same level. All the

optimized geometries were verified by vibrational frequency analysis at the same level of theory and found as true minima, as negative vibrational frequencies were not present in all cases. All the TD-DFT calculations were performed for the 10 lowest singlet and triplet states on the  $S_0$  and  $T_1$  geometries. Spin-orbit coupling matrix elements (SOCMEs) were calculated from TD-DFT results at the B3LYP/6-31G(d) level for the ten lowest singlet and triplet transitions by using the Orca 5.0.3 package software. NEDA calculations were performed on Gaussian 16 with NBO version 7.0. Due to limitations on the number of shells in NBO calculations, it was impossible to perform NEDA calculations for all molecules in the cluster models shown in Figures S15-S17. Therefore, NEDA calculations were conducted for models divided into groups of 2 to 3 molecules, consisting of the central molecule and its surrounding molecules. Finally, the sum of the calculated energies was obtained from the results of each calculation. Dividing the models may not be appropriate when there are strong intermolecular interactions between the divided molecules. However, in the cases studied in this work, since there are no strong intermolecular interactions between the molecules, the division did not significantly impact the computational results. In fact, even when the model was divided with different combinations of molecules, the computational results did not change significantly.

#### *XRD measurements*

Single crystal X-ray diffraction data was collected at 100 K on a Bruker AXS SMART APEX II ULTRA diffractometer or on a Rigaku XtaLAB Synergy R, DW diffractometer at Natural Science Center for Basic Research and Development (N-BARD), Hiroshima University, using  $\text{MoK}\alpha$  radiation monochromated with a multilayered confocal mirror. The structure was solved by Intrinsic Phasing on the SHELXT-2014/5 program or by the CrysAlis Pro and expanded using Fourier techniques. Non-hydrogen atoms were refined anisotropically, whereas hydrogen atoms were included but not refined (SHELXL-2017/1). All other calculations were performed using the APEXII crystallographic software package of Bruker AXS or using the OLEX2 program. Graphical crystal structures were generated using Mercury 4.3.1 (Cambridge Crystallographic Data Centre).

### Preparation of water-dispersible **H-Si-Mes** and pyrene

The crystal of **H-Si-Mes** or pyrene were co-incubated with P123 in MilliQ (**H-Si-Mes** or pyrene 0.5 mg; P123, 4.5 mg) and the resulting solution was sonicated (60 W, 5 min) with probe type sonicator on ice. After removal of precipitation by centrifugation (4 °C, 10000 g, 15 min), the dispersibility was confirmed by measuring UV-Vis absorption spectrum. We further addressed size of the complex of **H-Si-Mes** with P123 by dynamic light scattering (DLS) measurement (Zeta Sizer Nano, Malvern, UK). In addition, their electrochemically negative character was also revealed by  $\zeta$ -potential measurement. Morphological observation was carried out by transmission electron microscope (TEM, JEM-1400, JEOL Ltd. Co., Japan). The samples were casted on the grid and stained with 4 % phosphotungstic acid. The stained samples were observed by TEM (acceleration voltage, 100 keV).

### Bioimaging

Murine colon carcinoma cells were exposed to the complex of **H-Si-Mes** with P123 for 24 h. After washing with PBS, the medium were exchanged with fresh medium. The samples were observed by confocal laser scanning microscopy (LSM700, Carl Zeiss, Germany).

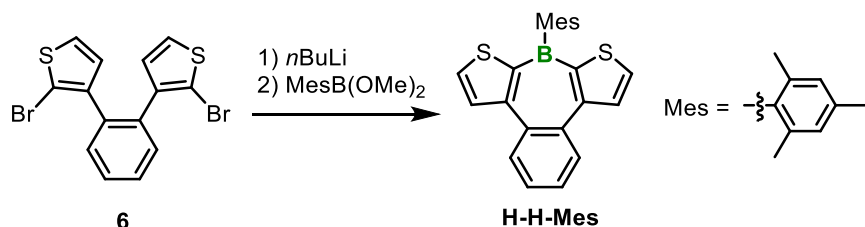

### Synthesis of **H-H-Mes**

To a solution of 1.00 g (2.50 mmol) of **6** in 9.5 mL of toluene and 2.5 mL of diethyl ether was added 3.30 mL (5.13 mmol) of 1.55 mol/L  $n\text{BuLi}$  in hexane at  $-78$  °C over a period of 5 min and the mixture was stirred at this temperature for 20 min. To this was added 528 mg (2.75 mmol) of  $\text{MesB}(\text{OMe})_2$  at this temperature and the mixture was stirred at room temperature overnight. The resulting mixture was hydrolyzed with saturated  $\text{NH}_4\text{Cl}$  aqueous solution, and 30 mL of toluene was added. The organic layer was separated, and the aqueous layer was extracted with 30 mL of toluene. The combined organic layers were washed twice with water and then once with brine. After drying over anhydrous magnesium sulfate, the solvent was evaporated. The crude

product was purified by silica gel chromatography using a mixed solvent of *n*-hexane/dichloromethane = 4/1 as the eluent to give 504 mg (1.36 mmol, 54% yield) of **H-H-Mes** as a white solid. Crystals obtained by recrystallization from a hexane solution of the above product were used for optical and X-ray analysis.  $^1\text{H}$  NMR (500 MHz,  $\text{CDCl}_3$ )  $\delta$ : 8.38 (dd,  $J = 6.2, 3.5$  Hz, 2H, Bz), 8.13 (d,  $J = 5.1$  Hz, 2H, Th), 7.94 (d,  $J = 5.0$  Hz, 2H, Th), 7.59 (dd,  $J = 6.2, 3.4$  Hz, 2H, Bz), 6.93 (d,  $J = 0.4$  Hz, 2H, Mes), 2.39 (s, 3H, Mes), 2.10 (s, 6H, Mes).  $^{13}\text{C}\{^1\text{H}\}$  NMR (126 MHz,  $\text{CDCl}_3$ )  $\delta$ : 150.8, 144.4 (br, B-C), 140.9 (br, B-C), 138.8, 137.5, 135.2, 133.1, 131.5, 131.2, 127.5, 127.1, 22.8, 21.4.  $^{11}\text{B}$  NMR (160 MHz,  $\text{CDCl}_3$ )  $\delta$ : 50.4. HRMS (APCI) Calcd. for  $\text{C}_{23}\text{H}_{19}\text{BClS}_2$ :  $[\text{M}+\text{Cl}]^-$ : 405.07152, Found: 405.07166. m.p. 177.3-179.0 °C.

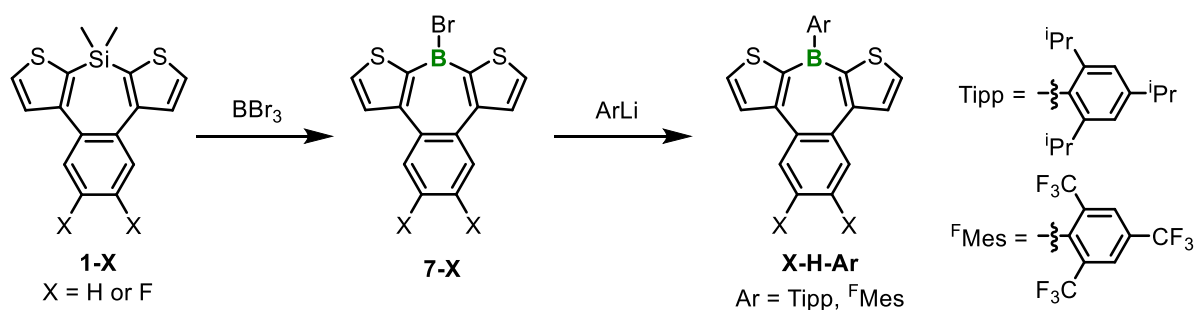

Synthesis of **6-X** from **1-X** has been already reported in our previous work.[S2]

### Synthesis of **H-H-Tipp**

To a solution of 1-bromo-2,4,6-triisopropylbenzene (0.671 g, 2.37 mmol) in 15 mL of diethyl ether was slowly added 3.05 mL (4.64 mmol) of 1.52 mol/L *t*BuLi in pentane at  $-78$  °C. The mixture was stirred for 1 hour at the temperature, then the solvent was removed in vacuum at  $0$  °C to give the lithium salt. The solid was redissolved in 7 mL of toluene at  $0$  °C, then cooled to  $-78$  °C. A solution of **6-H** (0.730 g, 2.21 mmol) in 8 mL of toluene was slowly added to the above solution, then the mixture was stirred overnight at room temperature. The resulting mixture was hydrolyzed with saturated  $\text{NH}_4\text{Cl}$  aqueous solution, and the organic layer was washed twice with brine. After drying over anhydrous magnesium sulfate, the solvent was evaporated. The crude product was purified by silica gel chromatography using a mixed solvent of *n*-hexane/dichloromethane = 4/1 as the eluent to give 614 mg (1.35 mmol, 61% yield) of the title compound as a white solid. Crystals obtained by recrystallization from a hexane solution of the above product were used for optical and X-ray analysis.  $^1\text{H}$  NMR (500 MHz,  $\text{CDCl}_3$ )  $\delta$ : 8.41 (dd,  $J = 6.2, 3.5$  Hz, 2H, Bz), 8.16 (d,  $J =$

5.1 Hz, 2H, Th), 7.92 (d,  $J = 5.1$  Hz, 2H, Th), 7.59 (dd,  $J = 6.2, 3.4$  Hz, 2H, Bz), 7.05 (s, 2H, Tipp), 2.98 (hept,  $J = 7.0$  Hz, 1H, Tipp), 2.42 (hept,  $J = 6.7$  Hz, 2H, Tipp), 1.34 (d,  $J = 6.9$  Hz, 6H, Tipp), 1.10 (d,  $J = 6.7$  Hz, 12H, Tipp).  $^{13}\text{C}\{^1\text{H}\}$  NMR (126 MHz,  $\text{CDCl}_3$ )  $\delta$ : 150.2, 150.1, 148.9, 145.6 (br, B–C), 138.6 (br, B–C), 134.9, 133.1, 131.6, 130.9, 127.4, 120.2, 35.4, 34.2, 24.8, 24.1.  $^{11}\text{B}$  NMR (160 MHz,  $\text{CDCl}_3$ )  $\delta$  50.4. HRMS (APCI) Calcd. for  $\text{C}_{29}\text{H}_{32}\text{BS}_2$ :  $[\text{M}+\text{H}]^+$ : 455.20330, Found: 455.20309. m.p. 207.2-207.6 °C.

### Synthesis of **F-H-Tipp**

**F-H-Tipp** was prepared from 0.385 g (1.36 mmol) of 1-bromo-2,4,6-triisopropylbenzene, 1.63 mL (2.48 mmol) of 1.52 mol/L *t*BuLi in pentane, 0.415 g (1.13 mmol) of **6-F**, 10 mL of diethyl ether as a white solid (308 mg, 0.628 mmol, 56% yield) in a manner similar to that above.  $^1\text{H}$  NMR (500 MHz,  $\text{CDCl}_3$ )  $\delta$ : 8.17 (t,  $J_{\text{C-F}} = 10.8$  Hz, 2H, Bz), 8.01 (d,  $J = 5.1$  Hz, 2H, Th), 7.94 (d,  $J = 5.1$  Hz, 2H, Th), 7.05 (s, 2H, Tipp), 2.99 (hept,  $J = 6.9$  Hz, 1H, Tipp), 2.37 (hept,  $J = 6.7$  Hz, 2H, Tipp), 1.34 (d,  $J = 6.9$  Hz, 6H, Tipp), 1.10 (d,  $J = 6.7$  Hz, 12H, Tipp).  $^{13}\text{C}\{^1\text{H}\}$  NMR (126 MHz,  $\text{CDCl}_3$ )  $\delta$ : 150.1, 149.1, 148.8 (dd,  $J_{\text{C-F}} = 251.8, 15.4$  Hz), 148.2, 135.5, 130.8, 130.5 (t,  $J_{\text{C-F}} = 4.3$  Hz), 120.3, 119.6 (dd,  $J_{\text{C-F}} = 12.6, 6.8$  Hz), 35.5, 34.2, 24.7, 24.1. Two signals for B–C were not detected, probably due to its low intensity as a result of quadrupolar broadening.  $^{11}\text{B}$  NMR (160 MHz,  $\text{CDCl}_3$ )  $\delta$ : 50.3. HRMS (APCI) Calcd. for  $\text{C}_{29}\text{H}_{29}\text{BClF}_2\text{S}_2$ :  $[\text{M}+\text{Cl}]^-$ : 525.14658, Found: 525.14752. m.p. 202.0-202.3 °C.

### Synthesis of **H-H-FMes**

To a solution of 1,3,5-tris(trifluoromethyl)benzene (0.677 g, 2.40 mmol) in 15 mL of diethyl ether was slowly added 1.40 mL (2.23 mmol) of 1.59 mol/L *n*BuLi in hexane at  $-78$  °C. The mixture was stirred for 3 hours at room temperature, then the solvent was removed in vacuum to give the lithium salt. The solid was redissolved in 7 mL of toluene at 0 °C, then cooled to  $-78$  °C. A solution of **6-H** (0.725 g, 2.19 mmol) in 8 mL of toluene was slowly added to the above solution, then the mixture was stirred overnight at room temperature. The resulting mixture was hydrolyzed with saturated  $\text{NH}_4\text{Cl}$  aqueous solution, and the organic layer was washed twice with brine. After drying over anhydrous magnesium sulfate, the solvent was evaporated. The crude product was purified by silica gel chromatography using *n*-hexane as the eluent to

give 466 mg (0.876 mmol, 40% yield) of the title compound as a white solid. Crystals obtained by recrystallization from a hexane solution of the above product were used for optical and X-ray analysis.  $^1\text{H}$  NMR (500 MHz,  $\text{CDCl}_3$ )  $\delta$ : 8.38 (dd,  $J = 6.2, 3.5$  Hz, 2H, Bz), 8.19 (s, 2H,  $^{\text{F}}\text{Mes}$ ), 8.14 (d,  $J = 5.1$  Hz, 2H, Th), 7.96 (d,  $J = 5.0$  Hz, 2H, Th), 7.61 (dd,  $J = 6.2, 3.4$  Hz, 2H, Bz).  $^{13}\text{C}\{^1\text{H}\}$  NMR (126 MHz,  $\text{CDCl}_3$ )  $\delta$ : 152.0, 143.8 (br, B–C), 141.3 (br, B–C), 135.0, 134.9 (q,  $J = 31.9$  Hz,  $o$ - $\text{CCF}_3$ ), 132.8, 132.0 (q,  $J = 34.5$  Hz,  $p$ - $\text{CCF}_3$ ), 131.7, 131.2, 127.9, 126.4 (br), 123.6 (q,  $J = 275.6$  Hz,  $o$ - $\text{CF}_3$ ), 122.9 (q,  $J = 272.8$  Hz,  $p$ - $\text{CF}_3$ ).  $^{11}\text{B}$  NMR (160 MHz,  $\text{CDCl}_3$ )  $\delta$ : 47.2. HRMS (APCI) Calcd. for  $\text{C}_{23}\text{H}_{11}\text{BF}_9\text{S}_2$ :  $M^+$ : 533.02460, Found: 533.02411. m.p. 157.2-157.9  $^\circ\text{C}$ .

### Synthesis of **F-H- $^{\text{F}}\text{Mes}$**

**F-H- $^{\text{F}}\text{Mes}$**  was prepared from 0.705 g (2.50 mmol) of 1,3,5-tris(trifluoromethyl)benzene, 1.46 mL (2.32 mmol) of 1.59 mol/L  $n\text{BuLi}$  in hexane, 0.852 g (2.32 mmol) of **6-F**, 15 mL of diethyl ether as a white solid (451 mg, 0.794 mmol, 34% yield) in a manner similar to that above.  $^1\text{H}$  NMR (500 MHz,  $\text{CDCl}_3$ )  $\delta$ : 8.19 (s, 2H,  $^{\text{F}}\text{Mes}$ ), 8.14 (t,  $J_{\text{C-F}} = 10.6$  Hz, 2H, Bz), 8.00 (d,  $J = 5.1$  Hz, 2H, Th), 7.98 (d,  $J = 5.1$  Hz, 2H, Th).  $^{13}\text{C}\{^1\text{H}\}$  NMR (126 MHz,  $\text{CDCl}_3$ )  $\delta$ : 150.0, 149.0 (dd,  $J_{\text{C-F}} = 253.0, 15.1$  Hz), 143.2 (br, B–C), 141.5 (br, B–C), 135.6, 134.9 (q,  $J_{\text{C-F}} = 32.0$  Hz,  $o$ - $\text{CCF}_3$ ), 132.2 (q,  $J_{\text{C-F}} = 34.5$  Hz,  $p$ - $\text{CCF}_3$ ), 131.0, 130.2 (t,  $J_{\text{C-F}} = 4.4$  Hz), 126.4 (br), 123.5 (q,  $J_{\text{C-F}} = 275.6$  Hz,  $o$ - $\text{CF}_3$ ), 122.8 (q,  $J_{\text{C-F}} = 272.8$  Hz,  $p$ - $\text{CF}_3$ ), 119.8 (dd,  $J_{\text{C-F}} = 12.9, 7.1$  Hz).  $^{11}\text{B}$  NMR (160 MHz,  $\text{CDCl}_3$ )  $\delta$ : 47.8. HRMS (APCI) Calcd. for  $\text{C}_{23}\text{H}_8\text{BCIF}_{11}\text{S}_2$ :  $M^+$ : 602.96788, Found: 602.96832. m.p. 171.1-171.6  $^\circ\text{C}$ .

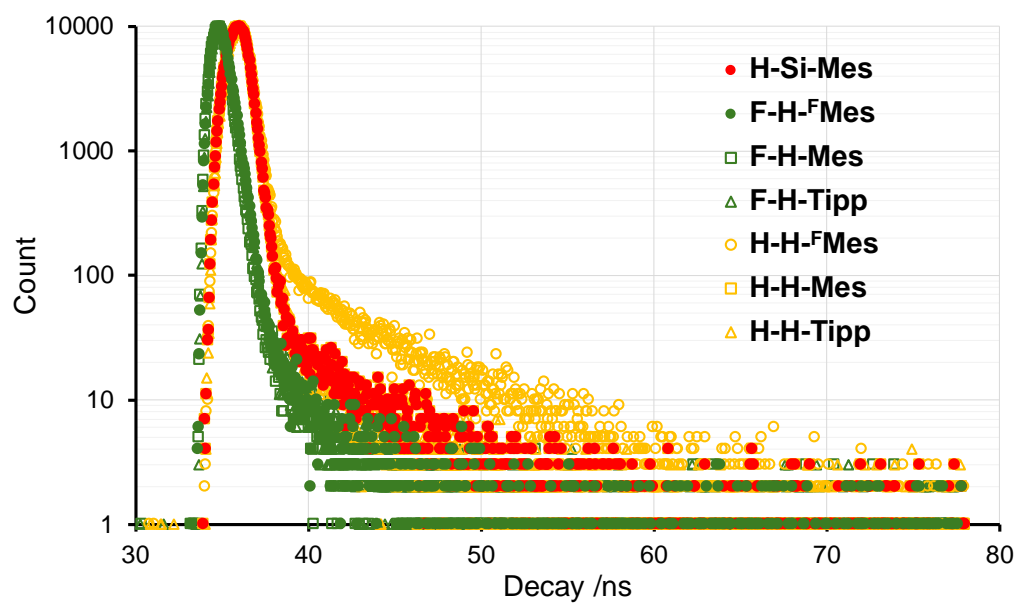

**Figure S1** Fluorescence decays of benzo[*d*]dithieno[*b,f*]borepins in THF at room temperature.

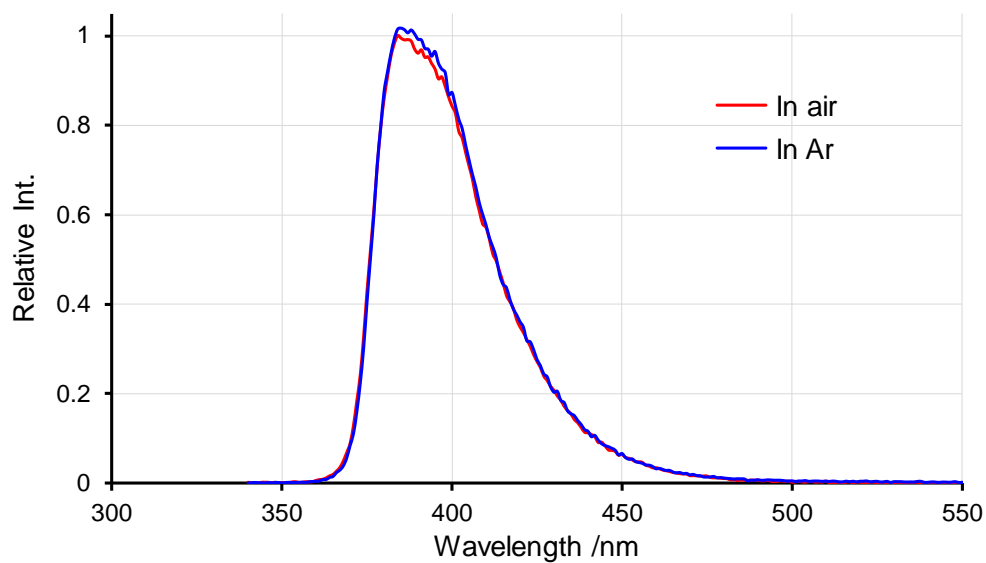

**Figure S2** Fluorescence spectra of **H-Si-Mes** before and after argon bubbling in THF at room temperature.



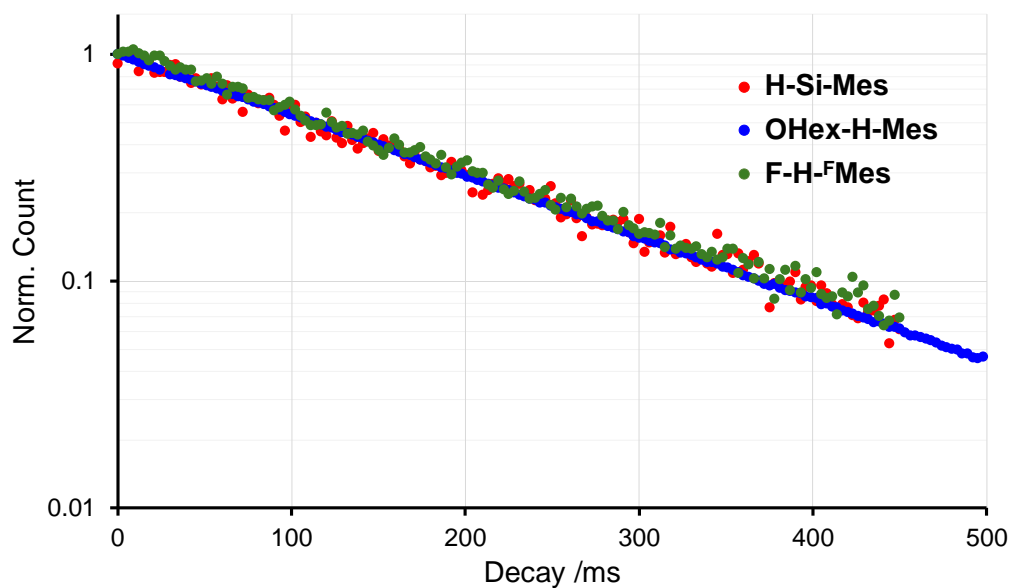

**Figure S3** Phosphorescence decays of benzo[*d*]dithieno[*b,f*]borepins in 2-THF glass matrix at 77 K.

| Compound        | Crystal | Amorphous |
|-----------------|---------|-----------|
| <b>F-H-Mes</b>  |         |           |
| <b>F-H-Tipp</b> |         |           |
| <b>H-H-FMes</b> |         |           |
| <b>H-H-Mes</b>  |         |           |
| <b>H-H-Tipp</b> |         |           |

**Figure S4** Photographs of recrystallized crystals of benzo[*d*]dithieno[*b,f*]borepins taken under room light or UV (365 nm).

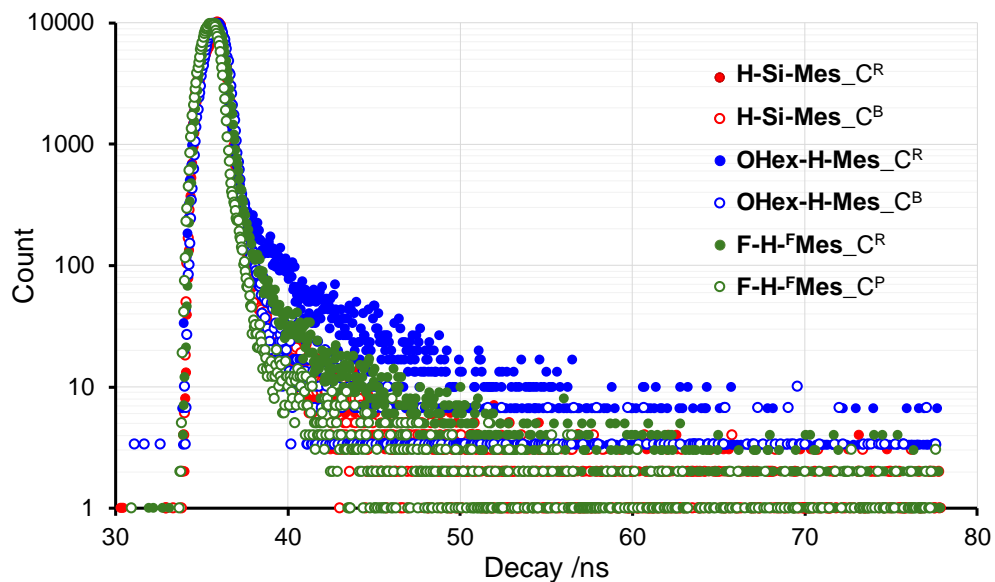

**Figure S5** Fluorescence decays of benzo[*d*]dithieno[*b,f*]borepins in the solid state at room temperature.

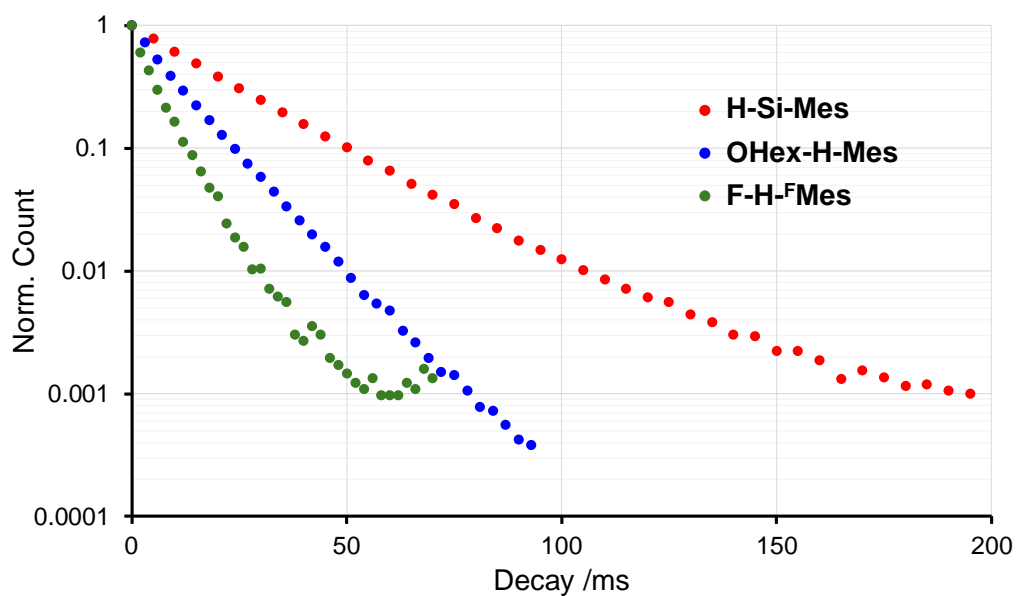

**Figure S6** Phosphorescence decays of benzo[*d*]dithieno[*b,f*]borepins in the solid state at room temperature.

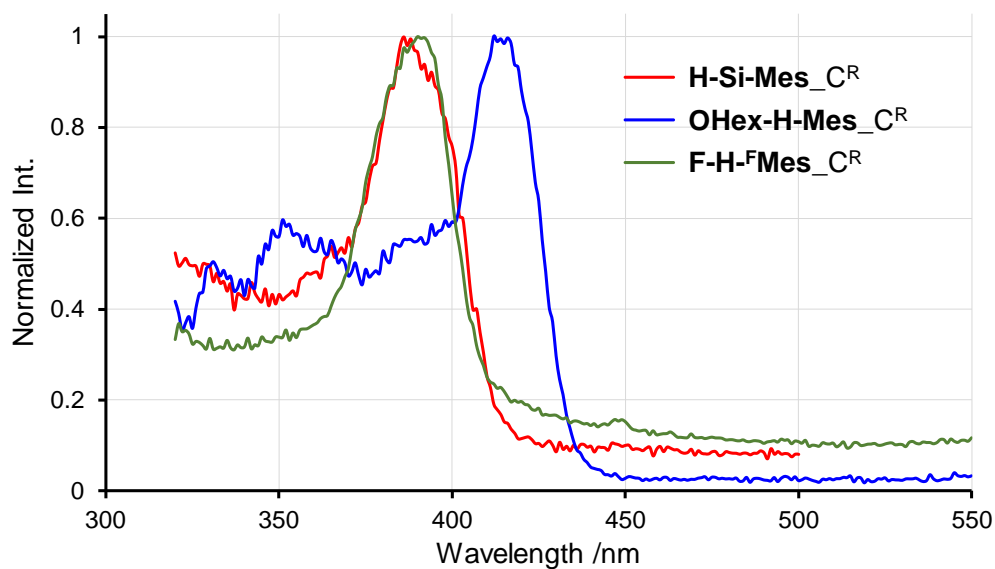

**Figure S7** Excitation spectra of the  $C^R$  crystals of the borepins in air at room temperature monitored at 600 nm.

In air    In vacuum

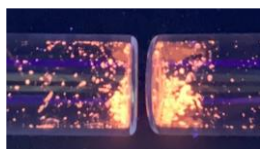

**Figure S8** Photographs of  $H-Si-Mes_{CR}$  taken under UV (365 nm) in air and vacuum.

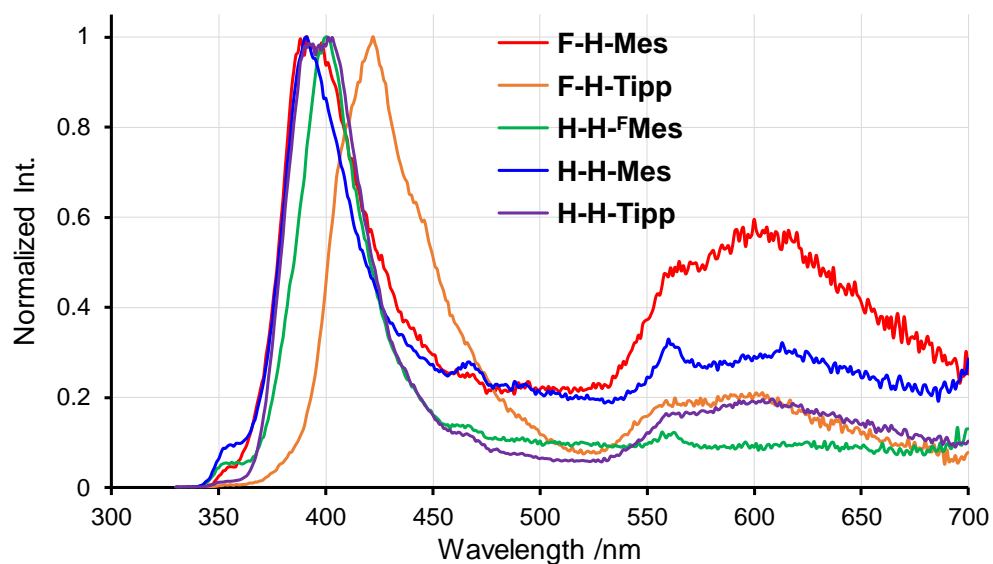

**Figure S9** PL spectra of crystals of  $X-H-Ar$  in air at room temperature.

**Table S1** Optical data of **X-H-Ar** in the solid state.

| Compound                   | $\lambda^{\text{FL}[a]}$ /nm | $\lambda^{\text{Phos}[b]}$ /nm | $\Phi_{\text{PL}}^{[c]}$ | $I^{\text{Phos}}/I^{\text{Fl}}^{[d]}$ |
|----------------------------|------------------------------|--------------------------------|--------------------------|---------------------------------------|
| <b>F-H-Mes</b>             | 391                          | 600                            | <0.02                    | 0.60                                  |
| <b>F-H-Tip</b>             | 422                          | 604                            | <0.02                    | 0.21                                  |
| <b>H-H-<sup>F</sup>Mes</b> | 400                          | 557                            | <0.02                    | 0.12                                  |
| <b>H-H-Mes</b>             | 391                          | 560                            | <0.02                    | 0.33                                  |
| <b>H-H-Tip</b>             | 401                          | 608                            | <0.02                    | 0.20                                  |

<sup>[a]</sup> Fluorescence maximum. <sup>[b]</sup> Phosphorescence maximum. <sup>[c]</sup> Absolute PL quantum yield at room temperature.

<sup>[d]</sup> Intensity ratio of fluorescent and phosphorescent bands.

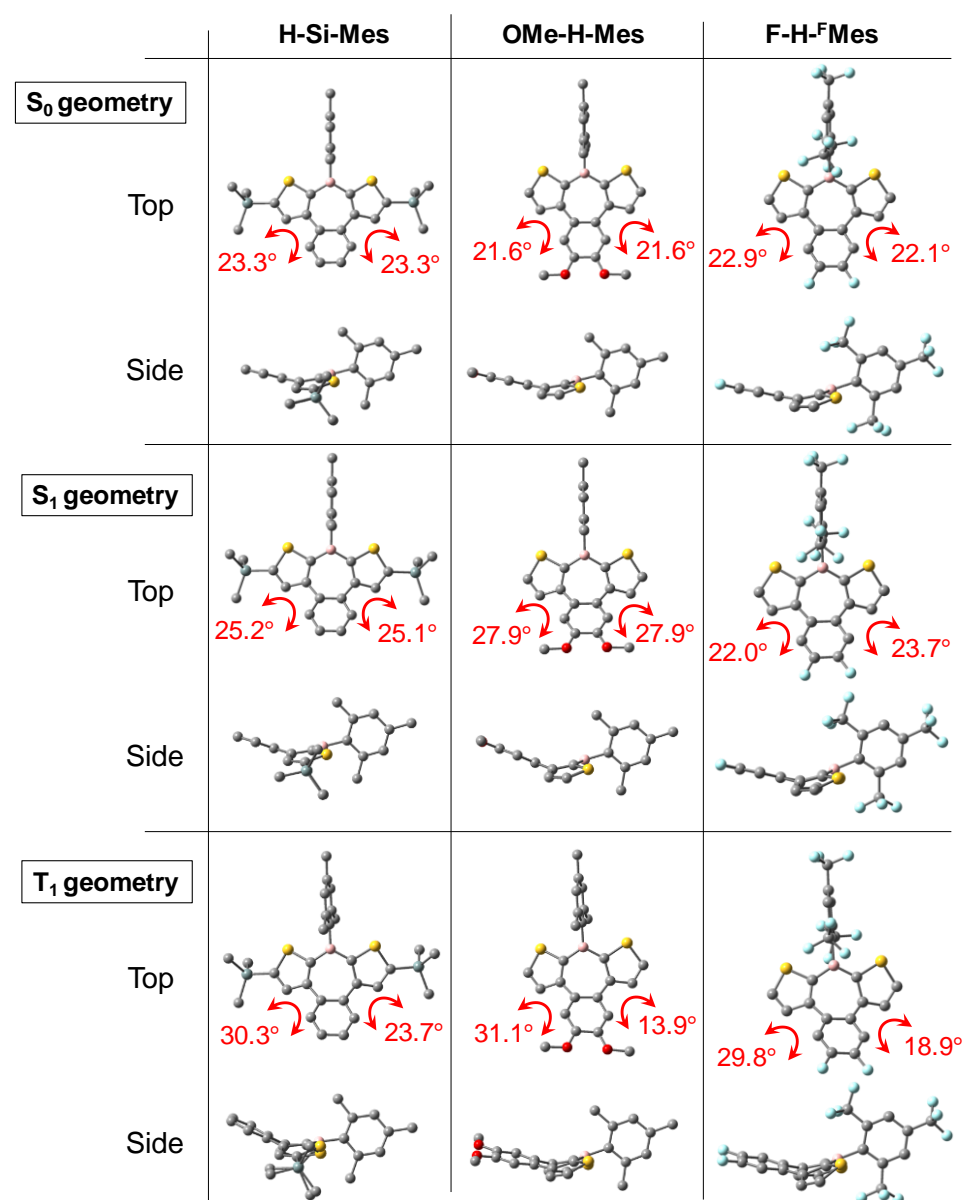

**Figure S10** Optimized structures of benzo[*d*]dithieno[*b,f*]borepins with dihedral angles of C=C-C=C in S<sub>0</sub>, S<sub>1</sub>, and T<sub>1</sub> geometries at the B3LYP/6-31G(d) level.

**Table S2** TD-DFT results of benzo[*d*]dithieno[*b,f*]borepins in T<sub>1</sub> geometry at the B3LYP/6-31G(d) level.

|                  | Excited State   | Composition | CI     | Excitation energy /eV | Wavelength /nm | Oscillator strength |      |
|------------------|-----------------|-------------|--------|-----------------------|----------------|---------------------|------|
| <b>H-Si-Mes</b>  | S0→S1           | H→L         | 0.700  | 3.27                  | 379            | 0.00                |      |
|                  | S0→S2           | H-1→L       | 0.677  | 3.50                  | 354            | 0.09                |      |
|                  | S0→T1           | H-3→L       | 0.369  | 2.66                  | 467            | 0.00                |      |
|                  |                 | H-2→L       | 0.486  |                       |                |                     |      |
|                  | S0→T2           | H-1→L       | 0.652  | 2.82                  | 439            | 0.00                |      |
|                  | S0→T3           | H→L         | 0.566  | 3.21                  | 387            | 0.00                |      |
|                  | S0→T4           | H-4→L       | -0.375 | -0.329                | 3.30           | 376                 | 0.00 |
|                  |                 | H-1→L+1     | -0.329 |                       |                |                     |      |
|                  |                 | H→L         | 0.383  |                       |                |                     |      |
|                  | S0→T5           | H-5→L       | 0.476  | -0.271                | 3.38           | 367                 | 0.00 |
|                  |                 | H-2→L+1     | -0.271 |                       |                |                     |      |
|                  |                 | H-1→L       | -0.231 |                       |                |                     |      |
| <b>OMe-H-Mes</b> | S0→S1           | H→L         | 0.688  | 3.27                  | 379            | 0.18                |      |
|                  | S0→S2           | H-1→L       | 0.701  | 3.43                  | 362            | 0.00                |      |
|                  | S0→T1           | H→L         | 0.676  | 2.70                  | 460            | 0.00                |      |
|                  | S0→T2           | H-2→L       | 0.512  | -0.360                | 2.73           | 454                 | 0.00 |
|                  |                 | H→L+1       | -0.360 |                       |                |                     |      |
|                  | S0→T3           | H-4→L       | -0.255 | 0.266                 | 3.19           | 388                 | 0.00 |
|                  |                 | H-2→L       | 0.266  |                       |                |                     |      |
|                  |                 | H→L+1       | 0.535  |                       |                |                     |      |
|                  | S0→T4           | H-1→L       | 0.655  | 3.40                  | 365            | 0.00                |      |
|                  | S0→T5           | H-6→L       | 0.381  | 0.419                 | 3.46           | 359                 | 0.00 |
|                  |                 | H-2→L+1     | 0.419  |                       |                |                     |      |
|                  | <b>F-H-FMes</b> | S0→S1       | H→L    | 0.676                 | 3.55           | 349                 | 0.12 |
| S0→S2            |                 | H-1→L       | 0.672  | 3.77                  | 329            | 0.08                |      |
| S0→T1            |                 | H-1→L       | 0.604  | -0.282                | 2.74           | 453                 | 0.00 |
|                  |                 | H→L+3       | -0.282 |                       |                |                     |      |
| S0→T2            |                 | H→L         | 0.649  | 2.88                  | 431            | 0.00                |      |
| S0→T3            |                 | H-2→L       | 0.385  | 0.465                 | 3.31           | 375                 | 0.00 |
|                  |                 | H→L+3       | 0.465  |                       |                |                     |      |
| S0→T4            |                 | H-3→L       | 0.426  | -0.403                | 3.47           | 357                 | 0.00 |
|                  |                 | H-1→L+3     | -0.403 |                       |                |                     |      |
| S0→T5            |                 | H-6→L+2     | 0.353  | 0.482                 | 3.59           | 345                 | 0.00 |
|                  |                 | H-4→L+1     | 0.482  |                       |                |                     |      |

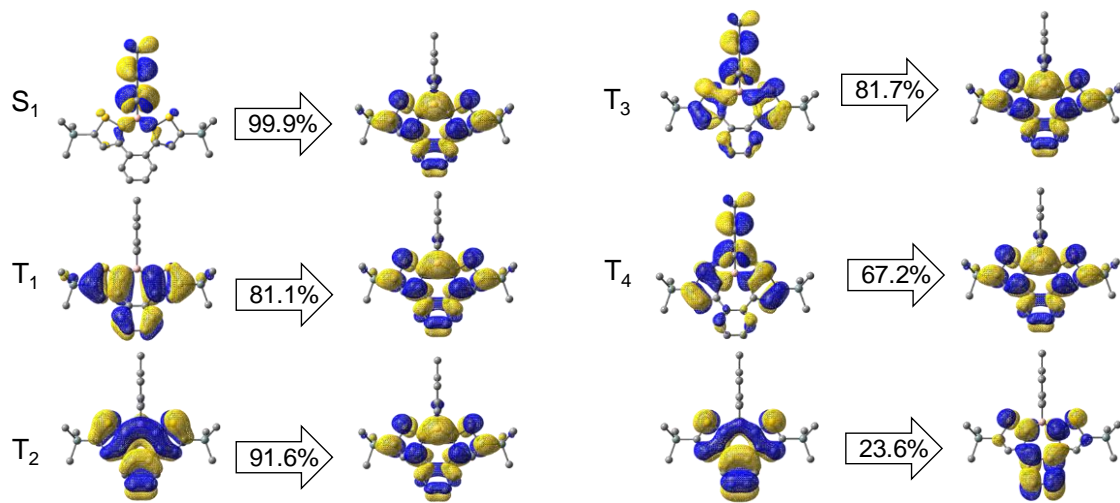

**Figure S11** NTOs of **H-Si-Mes** at the B3LYP/6-31G(d) level of theory.

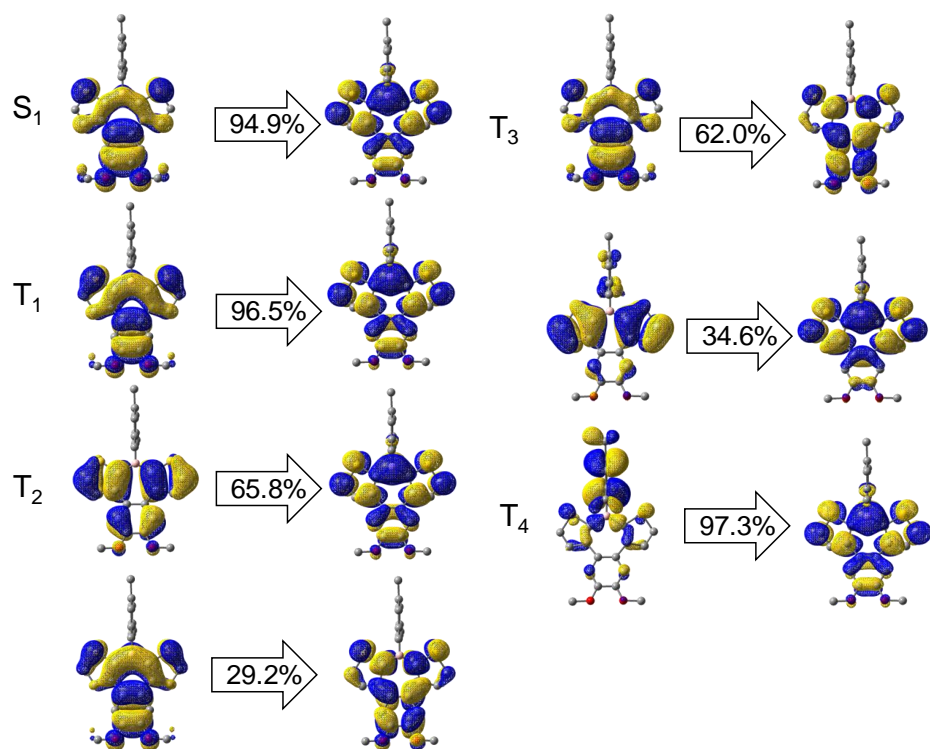

**Figure S12** NTOs of **H-Si-Mes** at the B3LYP/6-31G(d) level of theory.

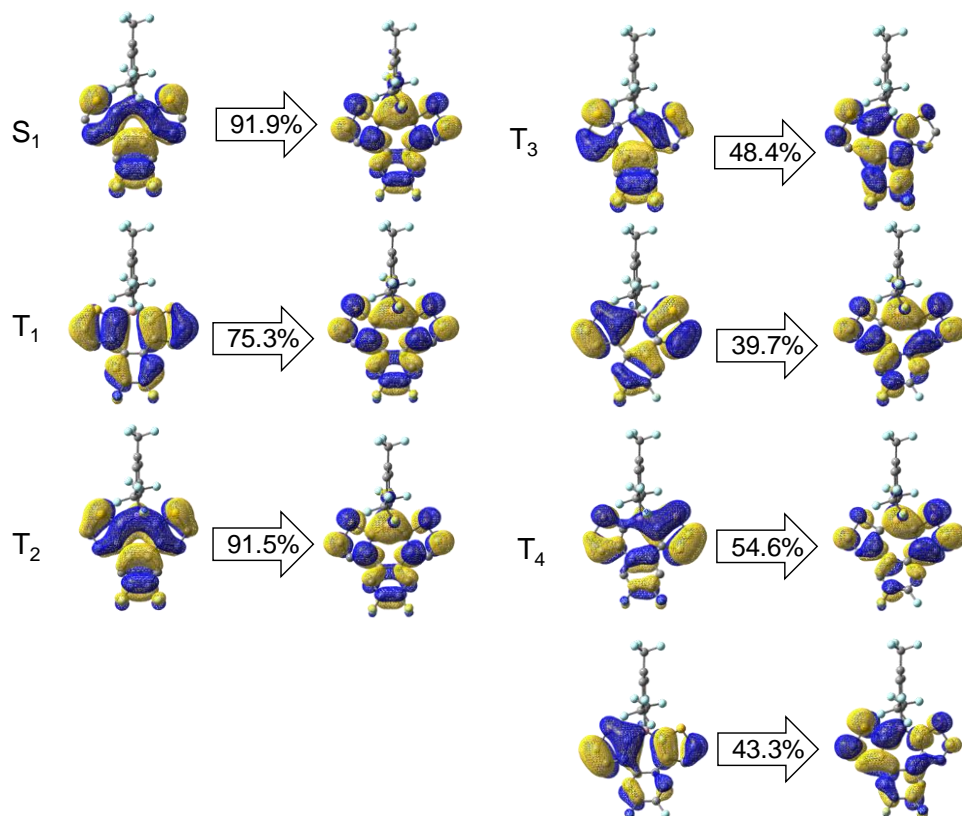

**Figure S13** NTOs of **H-Si-Mes** at the B3LYP/6-31G(d) level of theory.

**Table S3** SOCMEs ( $\text{cm}^{-1}$ ) and  $\Delta E_{\text{ST}}$  (eV) in  $S_0$  geometry for benzo[*d*]dithieno[*b,f*]borepins and model compounds at the B3LYP/6-31G(d) level. The chemical structures of model compounds **2-5** are shown in Figure S8.

| State                                          |                | H-Si-Mes | OMe-H-Mes | F-H-F <sup>Me</sup> s | H-H-Mes | 1-H  | 2    | 3    | 4    | 5     |
|------------------------------------------------|----------------|----------|-----------|-----------------------|---------|------|------|------|------|-------|
| T <sub>n</sub>                                 | S <sub>n</sub> |          |           |                       |         |      |      |      |      |       |
| 1                                              | 0              | 3.30     | 5.54      | 3.11                  | 3.29    | 1.25 | 0.39 | 2.17 | 0.24 | 0.28  |
| 1                                              | 1              | 1.16     | 0.10      | 1.94                  | 1.06    | 5.67 | 0.00 | 1.47 | 0.03 | 0.92  |
| 2                                              | 1              | 5.55     | 2.44      | 0.30                  | 5.33    | 0.14 | 0.00 | 0.17 | 0.00 | 5.42  |
| 3                                              | 1              | 4.52     | 2.71      | 2.44                  | 3.88    | 0.73 | 0.16 | 3.06 | 0.04 | 3.72  |
| 4                                              | 1              | 4.89     | 5.88      | 0.35                  | 3.51    | 1.96 | 0.06 | 0.05 | 0.01 | 1.98  |
| 5                                              | 1              | 4.03     | 0.11      | 0.45                  | 4.24    | 0.31 | 0.08 | 3.93 | 0.01 | 0.00  |
| $\sum_{n=1}^5  (S_1 \hat{H}_{\text{SO}} T_n) $ |                | 20.15    | 11.24     | 5.48                  | 18.02   | 8.81 | 0.30 | 8.68 | 0.09 | 12.04 |
| $\Delta E_{\text{ST}}$                         |                | 0.62     | 0.57      | 0.81                  | 0.63    | 1.29 | 1.33 | 0.93 | 1.11 | 0.92  |

**Table S4** SOCMEs ( $\text{cm}^{-1}$ ) in  $S_1$  geometry for benzo[*d*]dithieno[*b,f*]borepins at the B3LYP/6-31G(d) level.

| State                                    |       | H-Si-Mes | OMe-H-Mes | F-H- <sup>F</sup> Mes |
|------------------------------------------|-------|----------|-----------|-----------------------|
| $T_n$                                    | $S_n$ |          |           |                       |
| 1                                        | 0     | 4.61     | 8.37      | 4.71                  |
| 1                                        | 1     | 0.61     | 0.25      | 2.06                  |
| 2                                        | 1     | 3.87     | 2.63      | 0.63                  |
| 3                                        | 1     | 0.77     | 4.85      | 3.73                  |
| 4                                        | 1     | 6.67     | 5.51      | 0.16                  |
| 5                                        | 1     | 1.24     | 0.31      | 3.08                  |
| $\sum_{n=1}^5  (S_1 \hat{H}_{S_0} T_n) $ |       | 13.16    | 13.55     | 9.66                  |

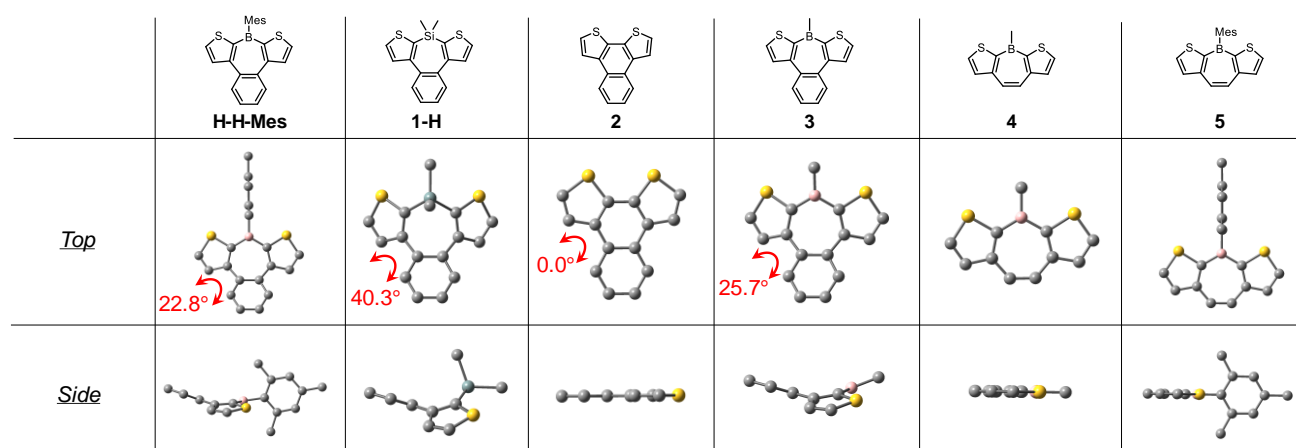**Figure S14** Optimized structures of model compounds in  $S_0$  geometry at the B3LYP/6-31G(d) level of theory.**Table S5** TD-DFT results of model compounds at the  $S_0$  geometries at the B3LYP/6-31G(d) level.

| Compound       | Excited State         | Composition           | CI       | Excitation energy /eV | Wavelength /nm | Oscillator strength |
|----------------|-----------------------|-----------------------|----------|-----------------------|----------------|---------------------|
| <b>H-H-Mes</b> | $S_0 \rightarrow S_1$ | H $\rightarrow$ L     | 0.70175  | 3.35                  | 370            | 0                   |
|                | $S_0 \rightarrow S_2$ | H-2 $\rightarrow$ L   | 0.57466  | 3.58                  | 346            | 0.01                |
|                |                       | H-1 $\rightarrow$ L   | 0.39831  |                       |                |                     |
|                | $S_0 \rightarrow S_3$ | H-2 $\rightarrow$ L   | -0.39242 | 3.63                  | 341            | 0.1                 |
|                |                       | H-1 $\rightarrow$ L   | 0.54303  |                       |                |                     |
|                | $S_0 \rightarrow S_4$ | H-3 $\rightarrow$ L   | 0.67166  | 3.76                  | 330            | 0.07                |
|                | $S_0 \rightarrow S_5$ | H-4 $\rightarrow$ L   | 0.67951  | 4.13                  | 301            | 0.04                |
|                | $S_0 \rightarrow T_1$ | H-3 $\rightarrow$ L   | 0.59001  | 2.73                  | 455            | 0                   |
|                |                       | H-1 $\rightarrow$ L+1 | 0.2487   |                       |                |                     |



|            |       |          |          |      |      |      |
|------------|-------|----------|----------|------|------|------|
| <b>1-H</b> | S0→T2 | H-2→L    | -0.21623 | 2.93 | 423  | 0    |
|            |       | H-1→L    | 0.60002  |      |      |      |
|            | S0→T3 | H-4→L    | -0.29018 | 3.29 | 377  | 0    |
|            |       | H-1→L+1  | 0.26835  |      |      |      |
|            |       | H→L      | 0.53218  |      |      |      |
|            | S0→T4 | H-4→L    | 0.30934  | 3.37 | 368  | 0    |
|            |       | H-1→L+1  | -0.30658 |      |      |      |
|            |       | H→L      | 0.43825  |      |      |      |
|            | S0→T5 | H-5→L    | 0.41454  | 3.49 | 356  | 0    |
|            |       | H-3→L+1  | -0.38815 |      |      |      |
|            |       | H-1→L    | 0.24218  |      |      |      |
|            | S0→S1 | H-1→L    | -0.45213 | 3.1  | 399  | 0    |
|            |       | H→L+1    | 0.46756  |      |      |      |
|            | S0→S2 | H-1→L+1  | 0.43198  | 3.27 | 379  | 0    |
|            |       | H→L      | -0.40458 |      |      |      |
| <b>2</b>   | S0→S3 | H-2→L    | 0.27097  | 3.63 | 342  | 0    |
|            |       | H-1→L    | 0.2332   |      |      |      |
|            |       | H-1→L+2  | 0.29103  |      |      |      |
|            |       | H→L+1    | 0.2548   |      |      |      |
|            | S0→S4 | H-3→L    | -0.35958 | 4.06 | 305  | 0    |
|            |       | H-2→L+1  | 0.27729  |      |      |      |
|            |       | H→L      | 0.43288  |      |      |      |
|            | S0→S5 | H-1→L    | 0.32687  | 4.13 | 300  | 0    |
|            |       | H-1→L+2  | -0.29265 |      |      |      |
|            |       | H→L+1    | 0.4098   |      |      |      |
|            | S0→S1 | H→L      | 0.68367  | 3.88 | 320  | 0.17 |
|            | S0→S2 | H-1→L    | 0.58272  | 4.06 | 305  | 0.03 |
|            |       | H→L+1    | 0.38892  |      |      |      |
|            | S0→S3 | H-2→L    | 0.54373  | 4.58 | 271  | 0    |
|            |       | H→L+2    | 0.44608  |      |      |      |
| S0→S4      | H→L+3 | 0.69955  | 4.62     | 268  | 0    |      |
| S0→S5      | H-1→L | -0.35929 | 4.89     | 254  | 0.36 |      |
|            | H→L+1 | 0.51989  |          |      |      |      |
| S0→T1      | H→L   | 0.67221  | 2.55     | 487  | 0    |      |
| S0→T2      | H-2→L | -0.41595 | 3.46     | 358  | 0    |      |
|            | H→L+2 | 0.45215  |          |      |      |      |
| S0→T3      | H-1→L | 0.68495  | 3.53     | 351  | 0    |      |
| S0→T4      | H→L+1 | 0.56349  | 3.94     | 314  | 0    |      |
|            | H→L+4 | 0.26232  |          |      |      |      |

|          |       |          |          |      |     |      |
|----------|-------|----------|----------|------|-----|------|
|          | S0→T5 | H-3→L    | 0.29946  | 3.99 | 311 | 0    |
|          |       | H→L+1    | -0.38469 |      |     |      |
|          |       | H→L+4    | 0.38823  |      |     |      |
|          | S0→S1 | H-1→L+1  | 0.45427  | 4.39 | 282 | 0    |
|          |       | H→L      | 0.52772  |      |     |      |
|          | S0→S2 | H→L+1    | 0.63637  | 4.58 | 271 | 0.03 |
|          | S0→S3 | H-1→L    | 0.62034  | 4.7  | 264 | 0.11 |
|          |       | H→L+1    | 0.28131  |      |     |      |
|          | S0→S4 | H-1→L+1  | -0.32811 | 4.96 | 250 | 0.18 |
|          |       | H→L      | 0.36342  |      |     |      |
|          |       | H→L+2    | 0.43811  |      |     |      |
|          | S0→S5 | H-2→L+1  | 0.43094  | 4.98 | 249 | 0.08 |
|          |       | H-1→L+1  | 0.36917  |      |     |      |
| <b>3</b> | S0→S1 | H→L      | 0.6684   | 3.7  | 335 | 0.08 |
|          | S0→S2 | H-1→L    | 0.68025  | 3.81 | 326 | 0.08 |
|          | S0→S3 | H-2→L    | 0.67665  | 4.23 | 293 | 0.04 |
|          | S0→S4 | H-3→L    | 0.4897   | 4.54 | 273 | 0.06 |
|          |       | H-1→L+1  | 0.45662  |      |     |      |
|          | S0→S5 | H→L+1    | 0.65184  | 4.64 | 267 | 0.36 |
|          | S0→T1 | H-1→L    | 0.60651  | 2.77 | 448 | 0    |
|          |       | H→L+1    | 0.27301  |      |     |      |
|          | S0→T2 | H-1→L+1  | 0.22306  | 2.98 | 417 | 0    |
|          |       | H→L      | 0.624    |      |     |      |
|          | S0→T3 | H-2→L    | 0.38152  | 3.38 | 367 | 0    |
|          |       | H→L+1    | 0.4485   |      |     |      |
|          | S0→T4 | H-3→L    | 0.41092  | 3.54 | 351 | 0    |
|          |       | H-1→L+1  | -0.38274 |      |     |      |
|          |       | H→L      | 0.29955  |      |     |      |
| S0→T5    | H-2→L | 0.50497  | 3.74     | 332  | 0   |      |
|          | H-1→L | 0.23759  |          |      |     |      |
|          | H→L+1 | -0.34278 |          |      |     |      |
| <b>4</b> | S0→S1 | H→L      | 0.65804  | 3.76 | 330 | 0.06 |
|          | S0→S2 | H-1→L    | 0.39648  | 4.02 | 308 | 0.03 |
|          |       | H→L+1    | 0.57599  |      |     |      |
|          | S0→S3 | H-2→L    | 0.2789   | 4.55 | 273 | 0.03 |
|          |       | H-1→L+1  | 0.59782  |      |     |      |
|          | S0→S4 | H-1→L    | 0.52842  | 4.66 | 266 | 0.65 |
|          |       | H→L+1    | -0.36282 |      |     |      |
|          | S0→S5 | H-3→L    | 0.19538  | 5.08 | 244 | 0.01 |

|          |       |         |          |      |     |      |
|----------|-------|---------|----------|------|-----|------|
|          |       | H-2→L   | -0.38328 |      |     |      |
|          |       | H-2→L+1 | 0.50786  |      |     |      |
|          | S0→T1 | H→L+1   | 0.63264  | 2.65 | 468 | 0    |
|          | S0→T2 | H→L     | 0.67472  | 3    | 414 | 0    |
|          | S0→T3 | H-2→L+2 | 0.15757  | 3.37 | 368 | 0    |
|          |       | H-1→L   | 0.61114  |      |     |      |
|          | S0→T4 | H-2→L   | -0.3216  | 3.49 | 355 | 0    |
|          |       | H-1→L+1 | 0.56509  |      |     |      |
|          | S0→T5 | H-2→L   | 0.50912  | 4.08 | 304 | 0    |
|          |       | H-1→L+1 | 0.37351  |      |     |      |
| <b>5</b> | S0→S1 | H-1→L   | 0.70483  | 3.57 | 347 | 0    |
|          | S0→S2 | H→L     | 0.66076  | 3.72 | 333 | 0.07 |
|          | S0→S3 | H-2→L   | 0.70597  | 3.8  | 326 | 0    |
|          | S0→S4 | H-1→L+1 | 0.70575  | 3.85 | 322 | 0    |
|          | S0→S5 | H-3→L   | 0.40897  | 3.98 | 312 | 0.02 |
|          |       | H→L+1   | 0.56778  |      |     |      |
|          | S0→T1 | H-3→L   | 0.22442  | 2.66 | 467 | 0    |
|          |       | H→L+1   | 0.63188  |      |     |      |
|          | S0→T2 | H→L     | 0.68084  | 2.97 | 418 | 0    |
|          | S0→T3 | H-3→L   | 0.61503  | 3.33 | 372 | 0    |
|          |       | H→L+1   | -0.26273 |      |     |      |
|          | S0→T4 | H-4→L   | -0.30596 | 3.48 | 356 | 0    |
|          |       | H-3→L+1 | 0.58149  |      |     |      |
|          | S0→T5 | H-1→L   | 0.70395  | 3.55 | 350 | 0    |

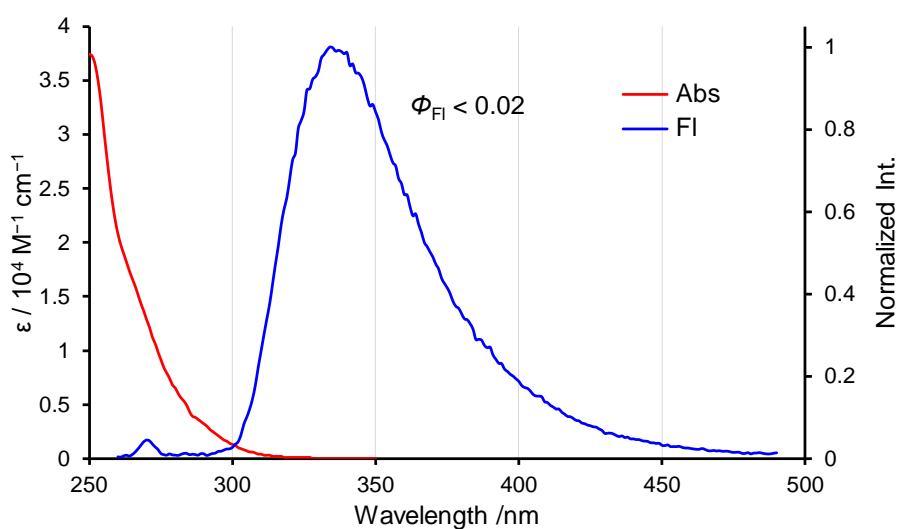

**Figure S15** Absorption and fluorescence spectra of **1-H** in 2-MeTHF at room temperature.

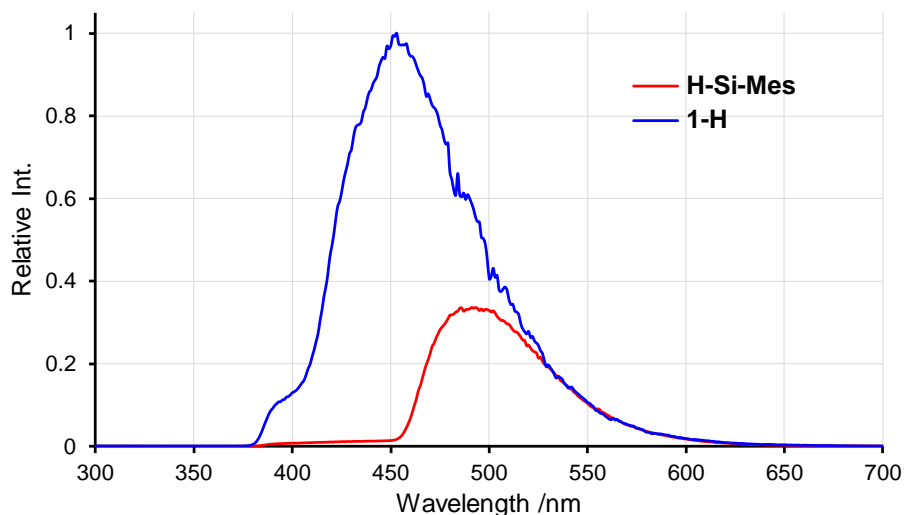

**Figure S16** Relative phosphorescence spectra of **H-Si-Mes** and **1-H** in 2-MeTHF at 77 K. The intensity is corrected by the absorption coefficients in 2-MeTHF.

**Table S6** TD-DFT results of benzo[*d*]dithieno[*b,f*]borepins in T<sub>1</sub> geometry at the B3LYP/6-31G(d) level.

| Compound                       | Excited State                  | Composition | CI     | Excitation energy /eV | Wavelength /nm | Oscillator strength |
|--------------------------------|--------------------------------|-------------|--------|-----------------------|----------------|---------------------|
| <b>H-Si-Mes</b>                | S <sub>0</sub> →S <sub>1</sub> | H-1→L       | 0.532  | 3.00                  | 413            | 0.05                |
|                                |                                | H→L         | -0.459 |                       |                |                     |
|                                | S <sub>0</sub> →S <sub>2</sub> | H-1→L       | 0.458  | 3.16                  | 393            | 0.14                |
|                                |                                | H→L         | 0.515  |                       |                |                     |
|                                | S <sub>0</sub> →T <sub>1</sub> | H→L         | 0.649  | 1.96                  | 632            | 0.00                |
|                                | S <sub>0</sub> →T <sub>2</sub> | H-3→L       | 0.618  | 2.71                  | 458            | 0.00                |
|                                | S <sub>0</sub> →T <sub>3</sub> | H-1→L       | 0.67   | 2.99                  | 414            | 0.00                |
|                                | S <sub>0</sub> →T <sub>4</sub> | H-5→L       | 0.451  | 3.16                  | 392            | 0.00                |
|                                |                                | H-3→L+1     | 0.319  |                       |                |                     |
|                                |                                |             |        |                       |                |                     |
| S <sub>0</sub> →T <sub>5</sub> | H-4→L                          | -0.331      | 3.23   | 384                   | 0.00           |                     |
|                                | H-2→L                          | 0.343       |        |                       |                |                     |
|                                | H→L+1                          | 0.318       |        |                       |                |                     |
| <b>OMe-H-Mes</b>               | S <sub>0</sub> →S <sub>1</sub> | H→L         | 0.685  | 2.97                  | 418            | 0.21                |
|                                | S <sub>0</sub> →S <sub>2</sub> | H-1→L       | 0.696  | 3.25                  | 381            | 0.00                |
|                                | S <sub>0</sub> →S <sub>3</sub> | H-2→L       | 0.645  | 3.44                  | 360            | 0.03                |
|                                | S <sub>0</sub> →S <sub>4</sub> | H-3→L       | 0.688  | 3.48                  | 357            | 0.00                |
|                                | S <sub>0</sub> →S <sub>5</sub> | H-4→L       | 0.557  | 3.93                  | 316            | 0.01                |
|                                |                                | H→L+1       | -0.402 |                       |                |                     |
|                                |                                | H→L+1       | -0.402 |                       |                |                     |
|                                | S <sub>0</sub> →T <sub>1</sub> | H→L         | 0.635  | 2.03                  | 611            | 0.00                |

|                            |       |         |        |      |     |      |
|----------------------------|-------|---------|--------|------|-----|------|
|                            | S0→T2 | H-2→L   | 0.562  | 2.75 | 451 | 0.00 |
|                            |       | H→L+1   | -0.132 |      |     |      |
|                            | S0→T3 | H→L+1   | 0.597  | 3.06 | 405 | 0.00 |
|                            | S0→T4 | H-1→L   | 0.647  | 3.21 | 386 | 0.00 |
|                            | S0→T5 | H-6→L   | 0.318  | 3.32 | 374 | 0.00 |
|                            |       | H-5→L   | -0.174 |      |     |      |
|                            |       | H-2→L+1 | 0.412  |      |     |      |
| <b>F-H-<sup>F</sup>Mes</b> | S0→S1 | H→L     | 0.681  | 3.14 | 395 | 0.15 |
|                            | S0→S2 | H-1→L   | 0.664  | 3.42 | 363 | 0.07 |
|                            | S0→S3 | H-2→L   | 0.619  | 3.85 | 322 | 0.02 |
|                            | S0→S4 | H→L+1   | 0.618  | 3.88 | 319 | 0.01 |
|                            | S0→S5 | H→L+2   | 0.675  | 4.08 | 304 | 0.00 |
|                            | S0→T1 | H→L     | 0.651  | 1.96 | 632 | 0.00 |
|                            | S0→T2 | H-1→L   | 0.639  | 2.77 | 447 | 0.00 |
|                            | S0→T3 | H-3→L   | 0.32   | 3.21 | 386 | 0.00 |
|                            |       | H-2→L   | 0.312  |      |     |      |
|                            |       | H-1→L+3 | 0.341  |      |     |      |
|                            |       | H→L+3   | 0.244  |      |     |      |
|                            | S0→T4 | H-3→L   | -0.301 | 3.27 | 379 | 0.00 |
|                            |       | H-2→L   | 0.222  |      |     |      |
|                            |       | H-1→L+3 | -0.219 |      |     |      |
|                            |       | H→L+3   | 0.41   |      |     |      |
|                            | S0→T5 | H-2→L   | 0.485  | 3.46 | 358 | 0.00 |
|                            |       | H-1→L+3 | -0.184 |      |     |      |
|                            |       | H→L+3   | -0.286 |      |     |      |

**Table S7** SOCMEs of benzo[*d*]dithieno[*b,f*]borepins in cm<sup>-1</sup> at the T<sub>1</sub> geometries at the B3LYP/6-31G(d) level.

| SOCME          |                | H-Si-Mes | OMe-H-Mes | F-H- <sup>F</sup> Mes | H-H-Mes |
|----------------|----------------|----------|-----------|-----------------------|---------|
| T <sub>n</sub> | S <sub>n</sub> |          |           |                       |         |
| 1              | 0              | 10.58    | 9.08      | 12.15                 | 10.69   |
| 1              | 1              | 2.76     | 1.81      | 2.57                  | 2.59    |
| 2              | 1              | 4.87     | 2.25      | 2.54                  | 4.85    |
| 3              | 1              | 2.83     | 3.55      | 0.39                  | 2.2     |
| 4              | 1              | 4.64     | 6.22      | 6.15                  | 3.88    |
| 5              | 1              | 5.45     | 1.91      | 5.72                  | 1.66    |

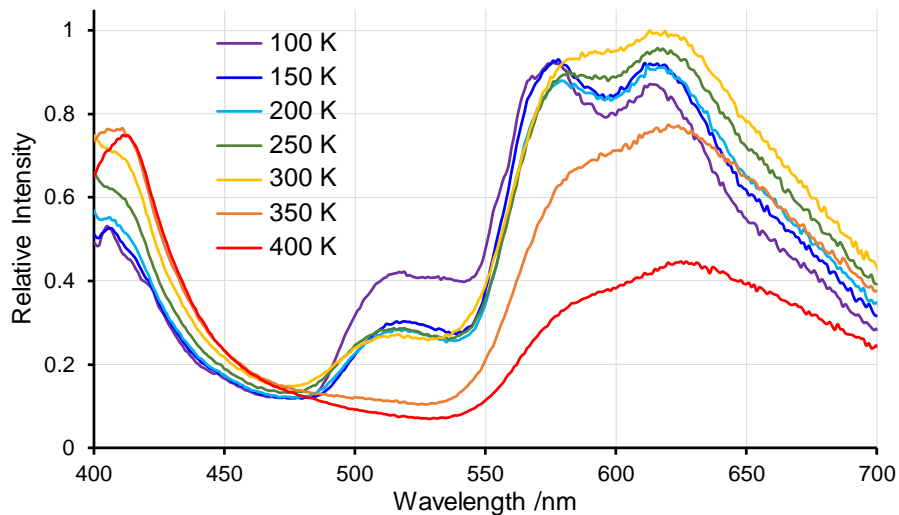

**Figure S17** VT photoluminescence spectra of **H-Si-Mes<sub>C</sub><sup>R</sup>** from 100 to 400 K in air.

**Table S8** Emission lifetime of **H-Si-Mes<sub>C</sub><sup>R</sup>** at various wavelengths under 100 K.

| Wavelength / nm | $\tau$ (ratio) / ms  |
|-----------------|----------------------|
| 520             | 69.4 (11) / 182 (89) |
| 620             | 138 (30) / 39.8 (70) |

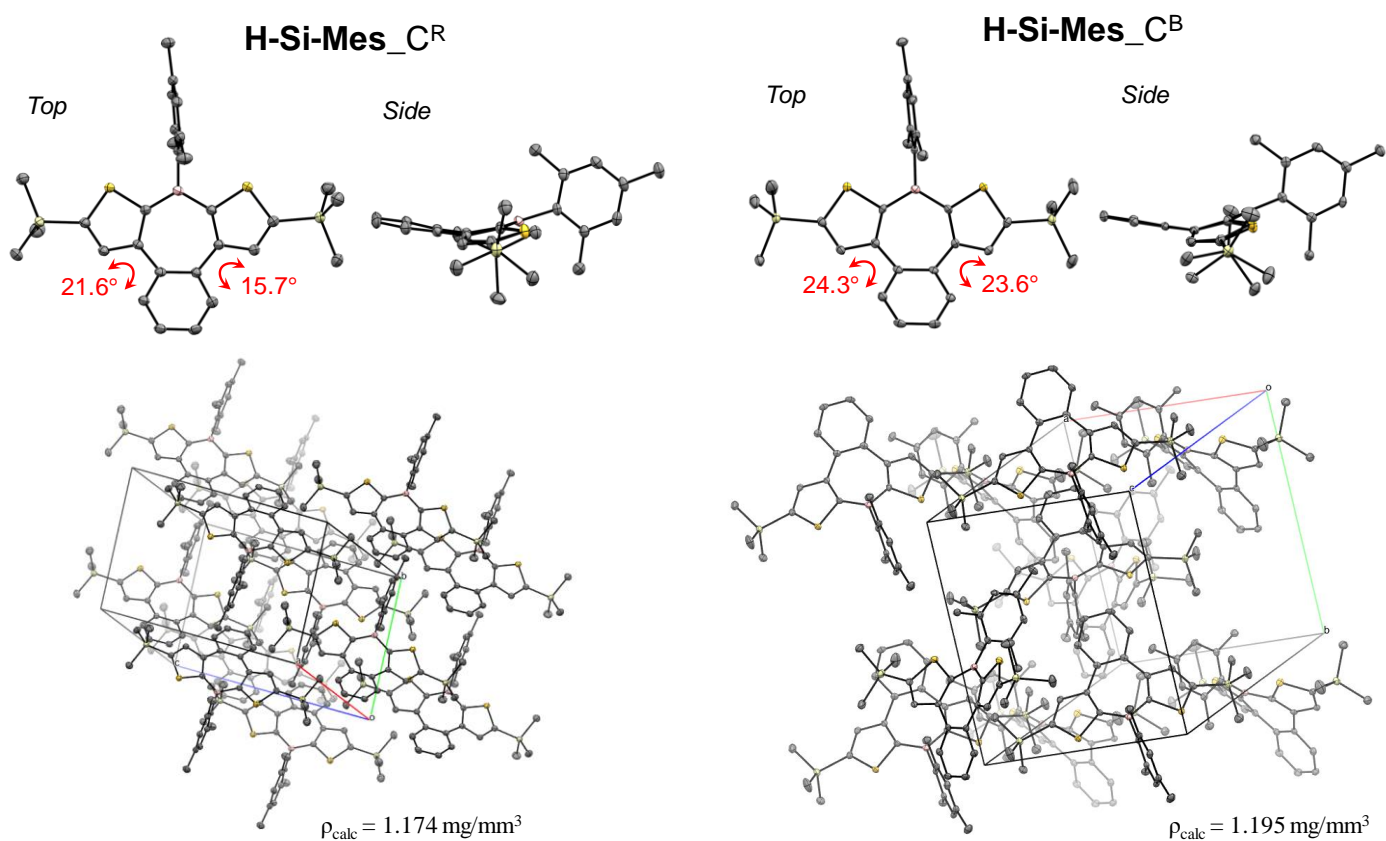

**Figure S18** ORTEP drawings and packing diagrams of **H-Si-Mes**.

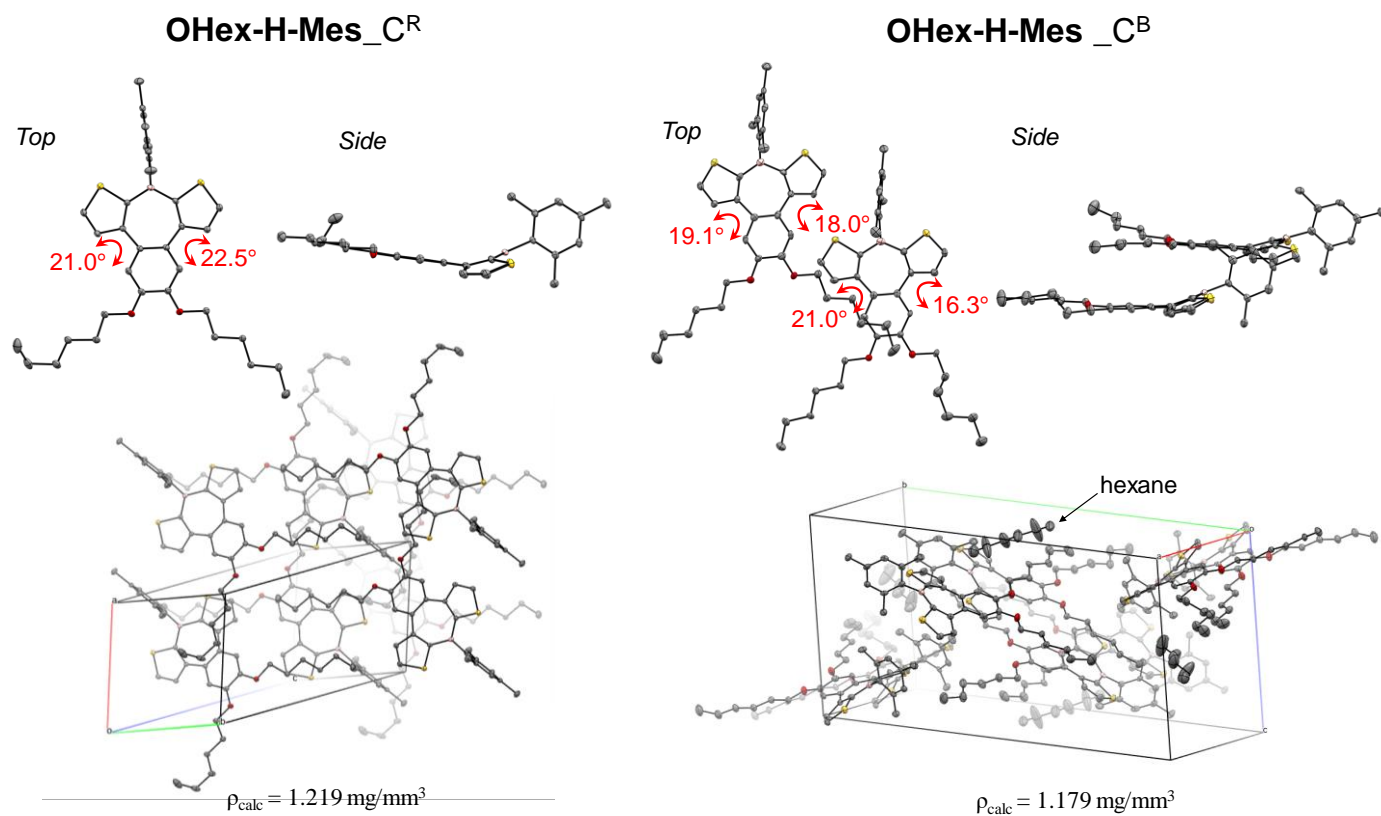

**Figure S19** ORTEP drawings and packing diagrams of **OHex-H-Mes**.

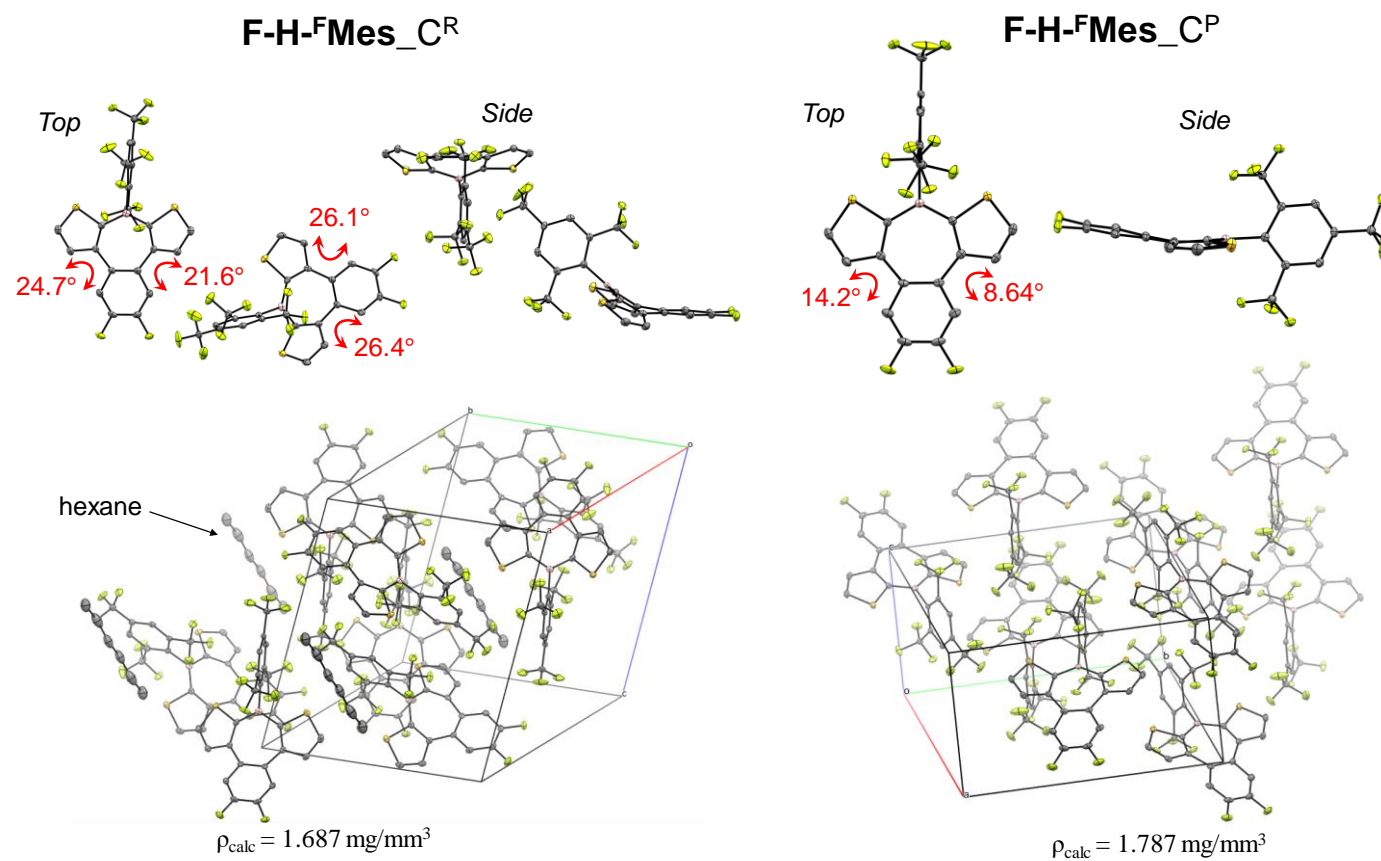

**Figure S20** ORTEP drawings and packing diagrams of **F-H-FMes**.

**H-Si-Mes\_C<sup>R</sup>**

**H-Si-Mes\_C<sup>B</sup>**

*Top*

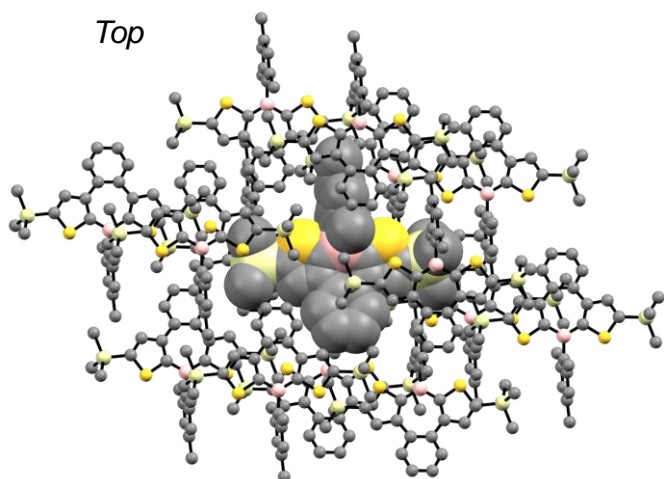

*Top*

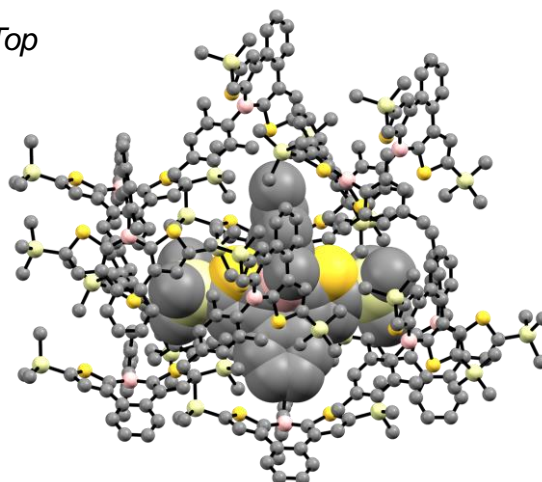

*Side*

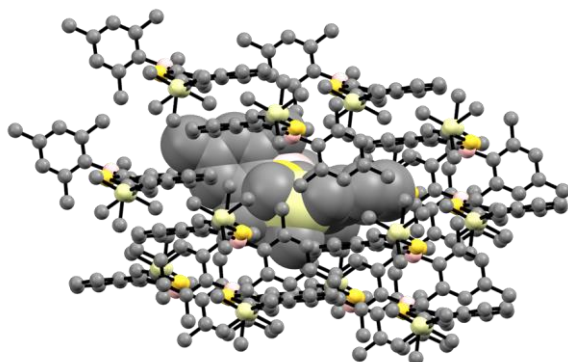

*Side*

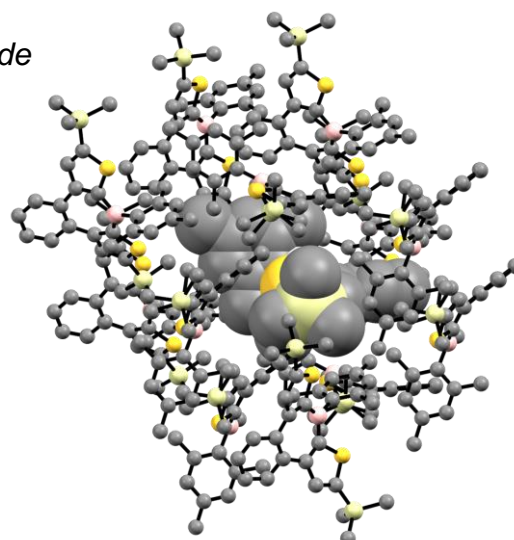

One central molecule  
+ 14 molecules in the periphery

One central molecule  
+ 12 molecules in the periphery

**Figure S21** Computational model of NEDA calculations for **H-Si-Mes**. The central and surrounding molecules are shown in the spacefill and ball and stick models, respectively.



**OHex-H-Mes\_C<sup>R</sup>**

*Top*

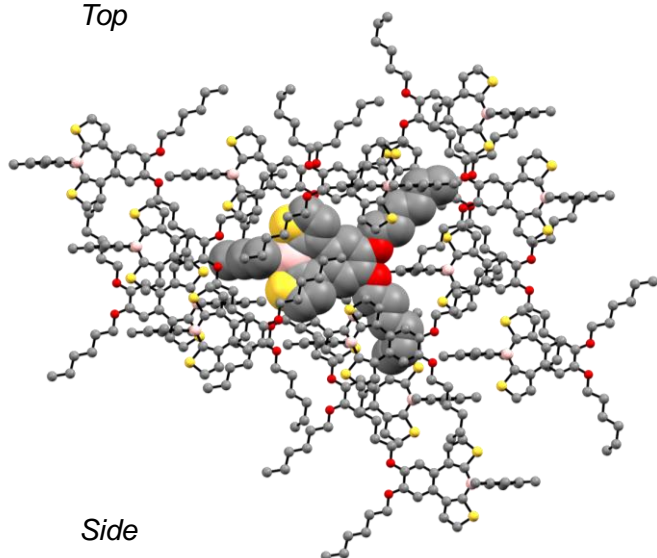

*Side*

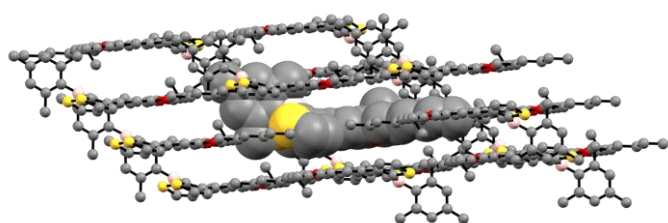

One central molecule  
+ 15 molecules in the periphery

**OHex-H-Mes\_C<sup>B</sup>**

*Top*

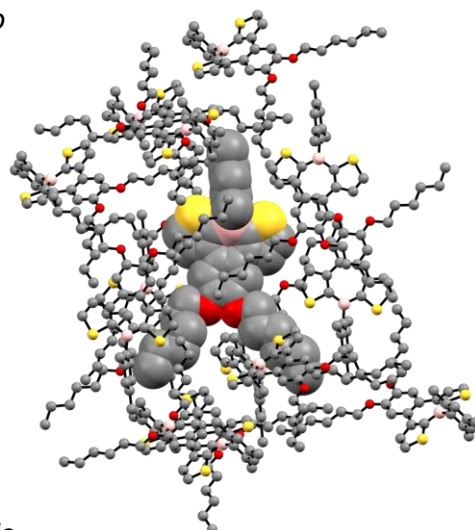

*Side*

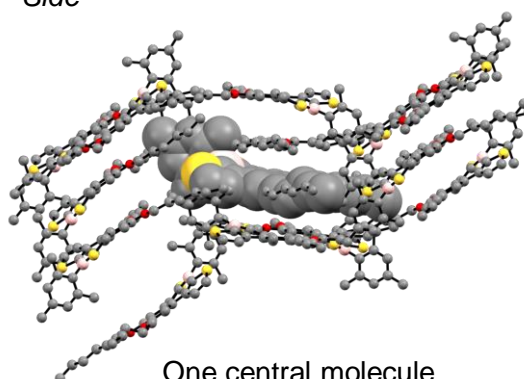

One central molecule  
+ 14 molecules in the periphery  
+ 3 hexane molecules

**Figure S22** Computational model of NEDA calculations for **OHex-H-Mes**. The central and surrounding molecules are shown in the spacefill and ball and stick models, respectively.

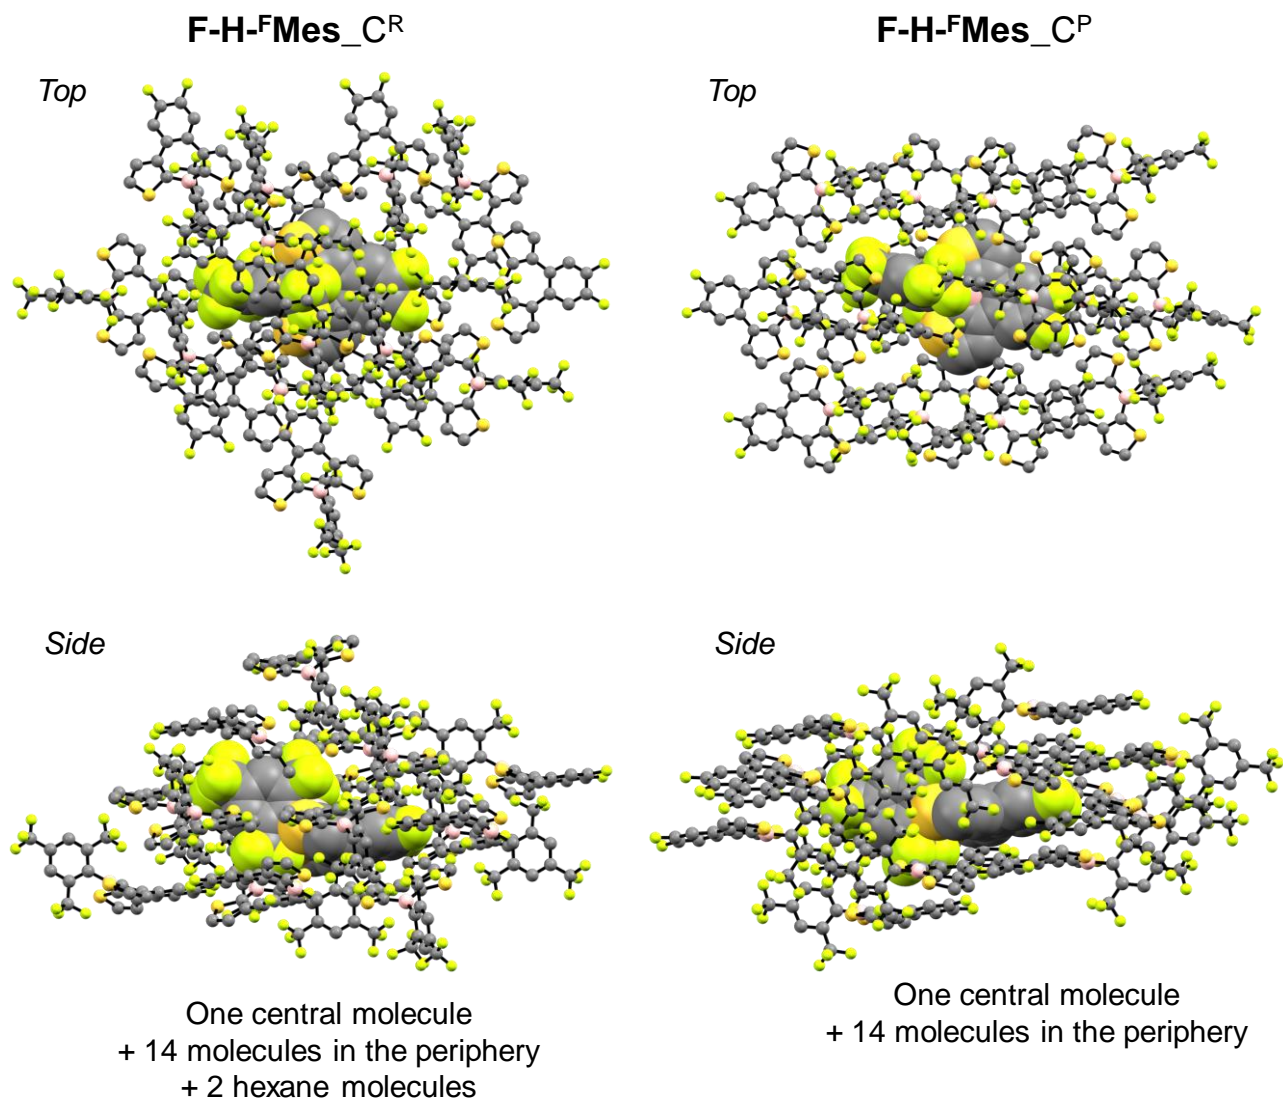

**Figure S23** Computational model of NEDA calculations for **F-H<sup>F</sup>Mes**. The central and surrounding molecules are shown in the spacefill and ball and stick models, respectively.

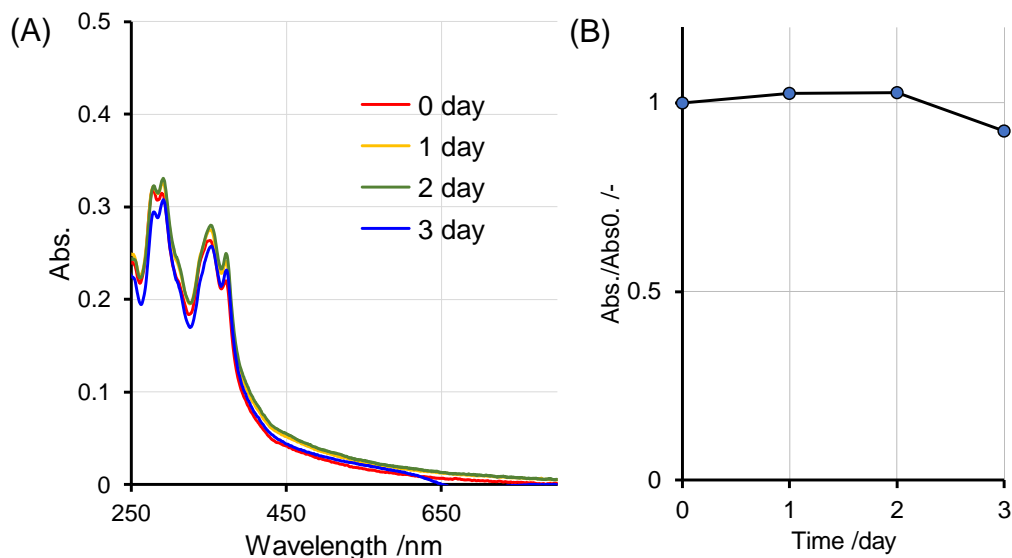

**Figure S24** Absorption spectra (A) and absorbance changes at 343 nm (B) of **H-Si-Mes** complexed with P123 in aqueous media.

**Table S9** Solution properties of complex of **H-Si-Mes** with P123.

|                      | $D_{hy}/nm^{[a]}$ | PDI <sup>[a]</sup> | $\zeta$ -potential /mV <sup>[b]</sup> | [ <b>H-Si-Mes</b> ] / $\mu M^{[c]}$ |
|----------------------|-------------------|--------------------|---------------------------------------|-------------------------------------|
| <b>H-Si-Mes/P123</b> | 190 $\pm$ 6       | 0.286              | -9.0 $\pm$ 0.5                        | 63.6                                |

<sup>[a]</sup> Hydrodynamic diameter ( $D_{hy}$ ) were determined by DLS and PDI was calculated by cumulant method. <sup>[b]</sup> The samples were measured in MilliQ (pH, 7.4; 25 °C). <sup>[c]</sup> Concentration of **H-Si-Mes** was determined by absorbance.

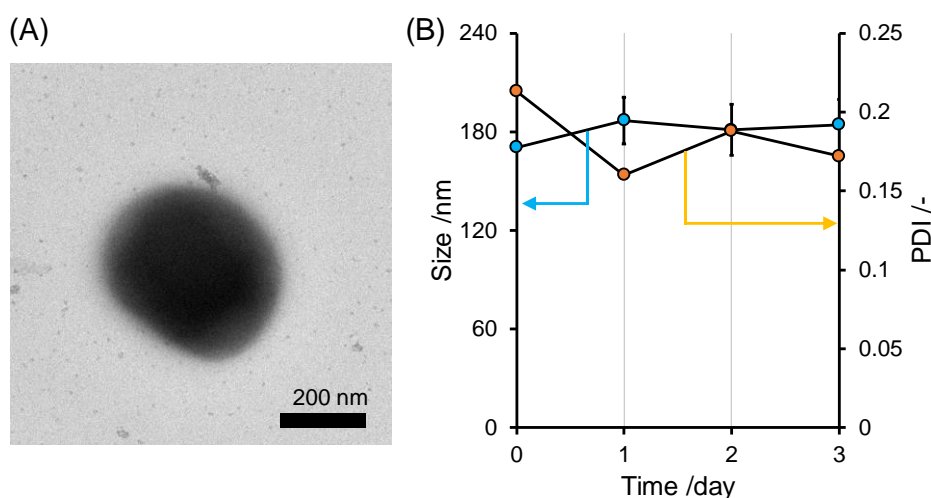

**Figure S25** (A) Representative morphology of **H-Si-Mes** with P123 observed by transmission electron microscopy. The samples were stained with 0.1 % ammonium molybdate. (B) Change in particle size and PDI.

### ***Hydrophobicity test of micelles***

We examined the encapsulation mechanism using P123 by pyrene since the ratio of fluorescence intensities at 375 ( $I_1$ ) and 385 nm ( $I_2$ ) work as the indicator for polarity in microenvironment such as hydrophobic core in micelles<sup>[S3]</sup> and cross-linking point in amphiphilic self-assembled nanogels.<sup>[S4]</sup> When pyrenes were dispersed with P123, the ratio was determined to be 0.66 (Fig. S25), which is relatively small and indicates that hydrophobic compounds can be trapped in hydrophobic nanodomain in P123 micelles.

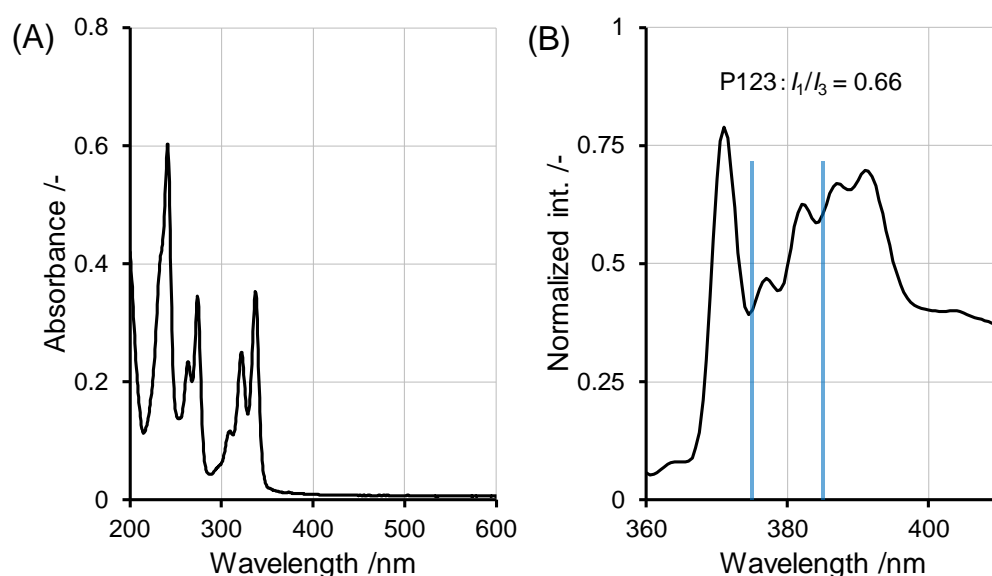

**Figure S26** Absorption (A) and fluorescence spectra (B) of pyrene complexed with P123 in aqueous media.

### **References**

- [S1] Y. Adachi and J. Ohshita, *Organometallics* **2018**, *37*, 869–881.
- [S2] Y. Adachi, F. Arai, and F. Jäkle, *Chem. Commun.* **2020**, *56*, 5119–5122.
- [S3] L. Piñeiro, M. Novo, W. Al-Soufi, *Adv. Colloid Interface Sci.* **2015**, *215*, 1–12.
- [S4] R. Kawasaki, Y. Sasaki, K. Akiyoshi, *Chem. Lett.* **2017**, *46*, 513–515.

## NMR spectra

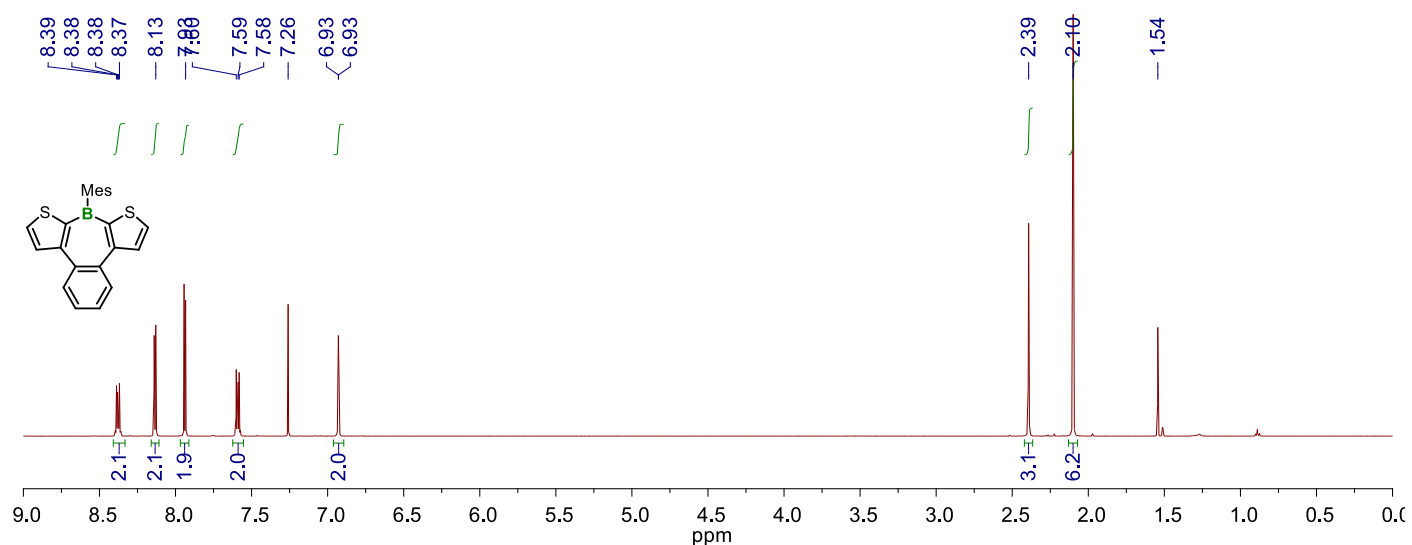

Figure S27  $^1\text{H}$  NMR spectrum of H-H-Mes in  $\text{CDCl}_3$  at room temperature (500 MHz).

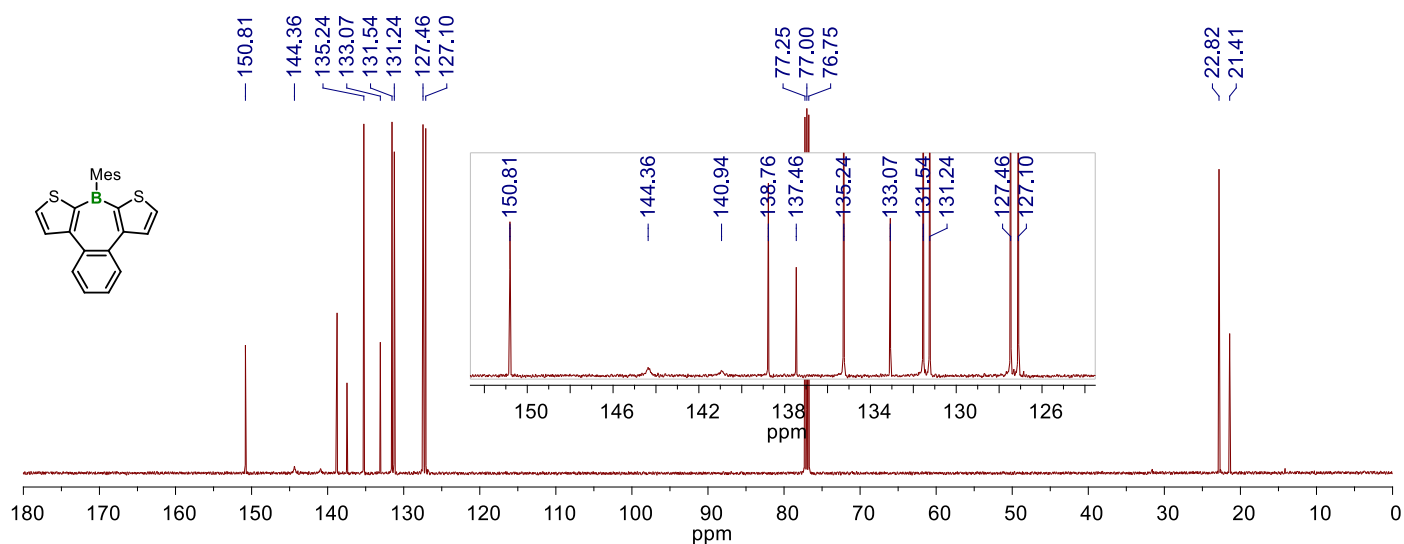

Figure S28  $^{13}\text{C}$  NMR spectrum of H-H-Mes in  $\text{CDCl}_3$  at room temperature (126 MHz).

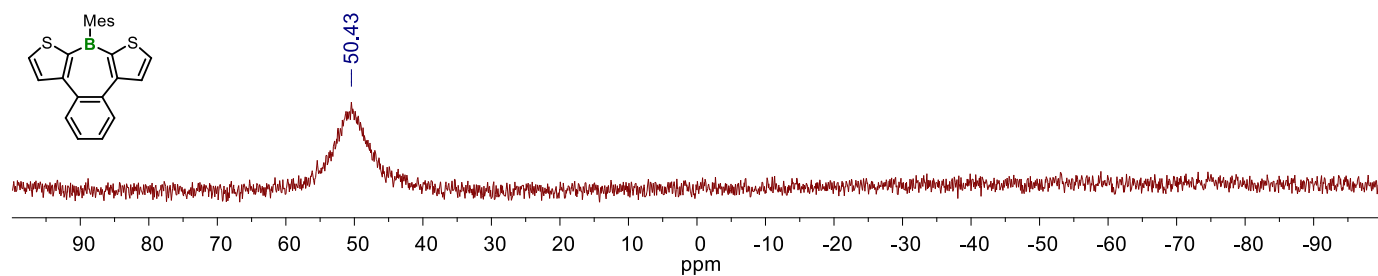

Figure S29  $^{11}\text{B}$  NMR spectrum of H-H-Mes in  $\text{CDCl}_3$  at room temperature (160 MHz).

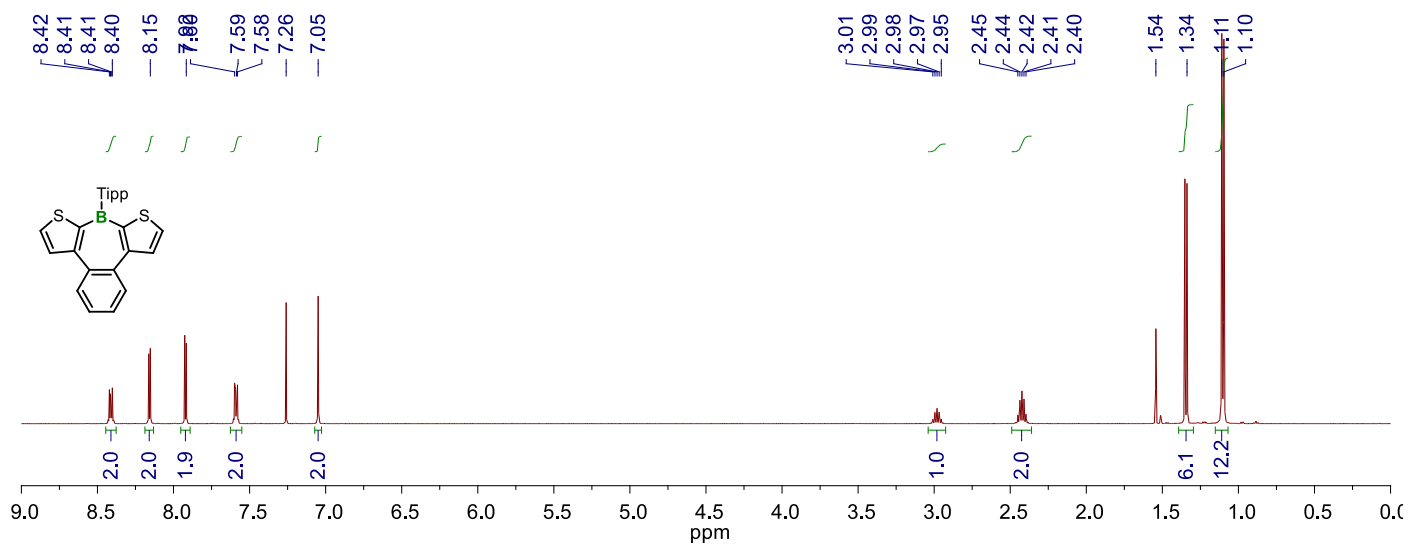

**Figure S30**  $^1\text{H}$  NMR spectrum of **H-H-Tipp** in  $\text{CDCl}_3$  at room temperature (500 MHz).

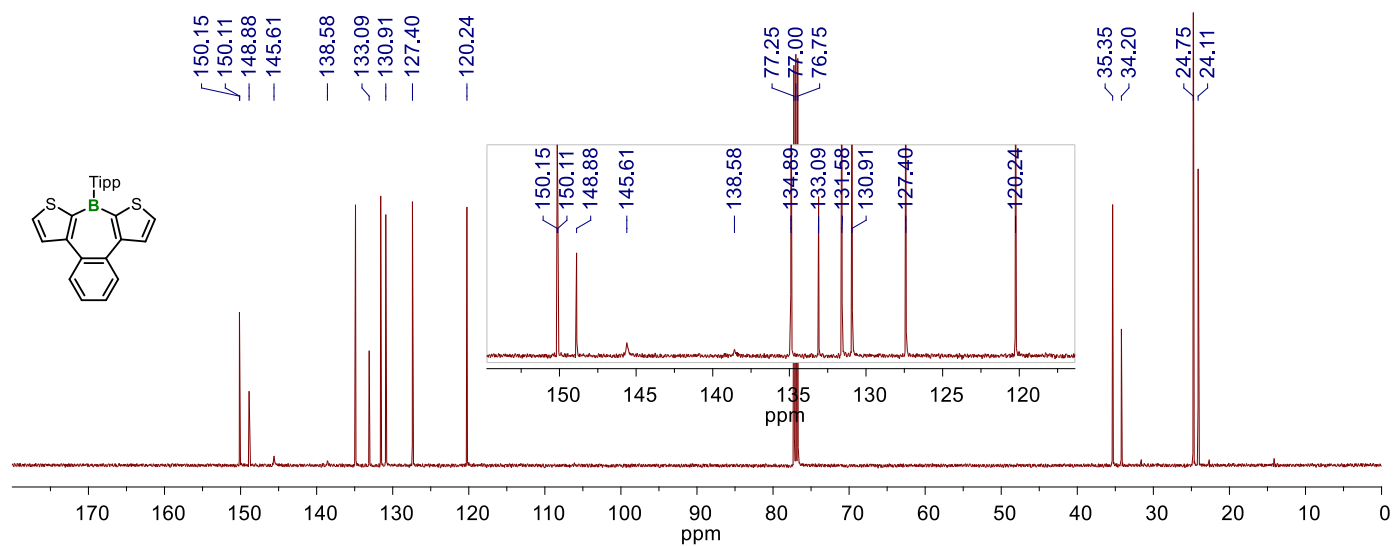

**Figure S31**  $^{13}\text{C}$  NMR spectrum of **H-H-Tipp** in  $\text{CDCl}_3$  at room temperature (126 MHz).

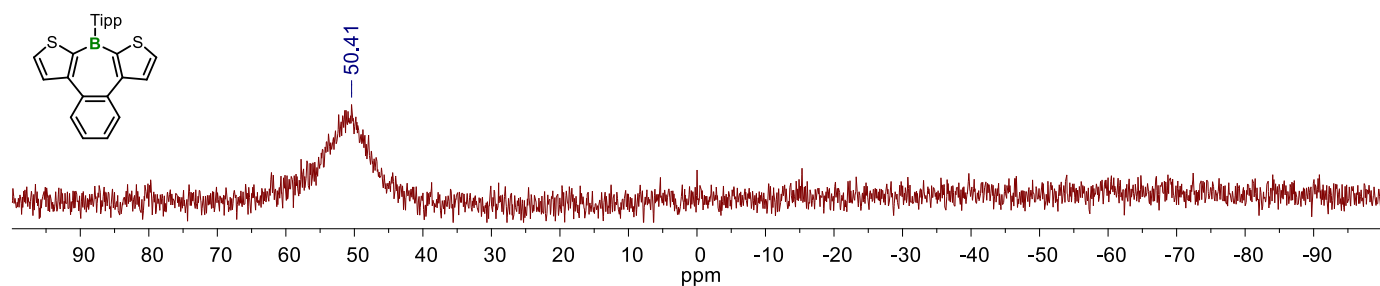

**Figure S32**  $^{11}\text{B}$  NMR spectrum of **H-H-Tipp** in  $\text{CDCl}_3$  at room temperature (160 MHz).

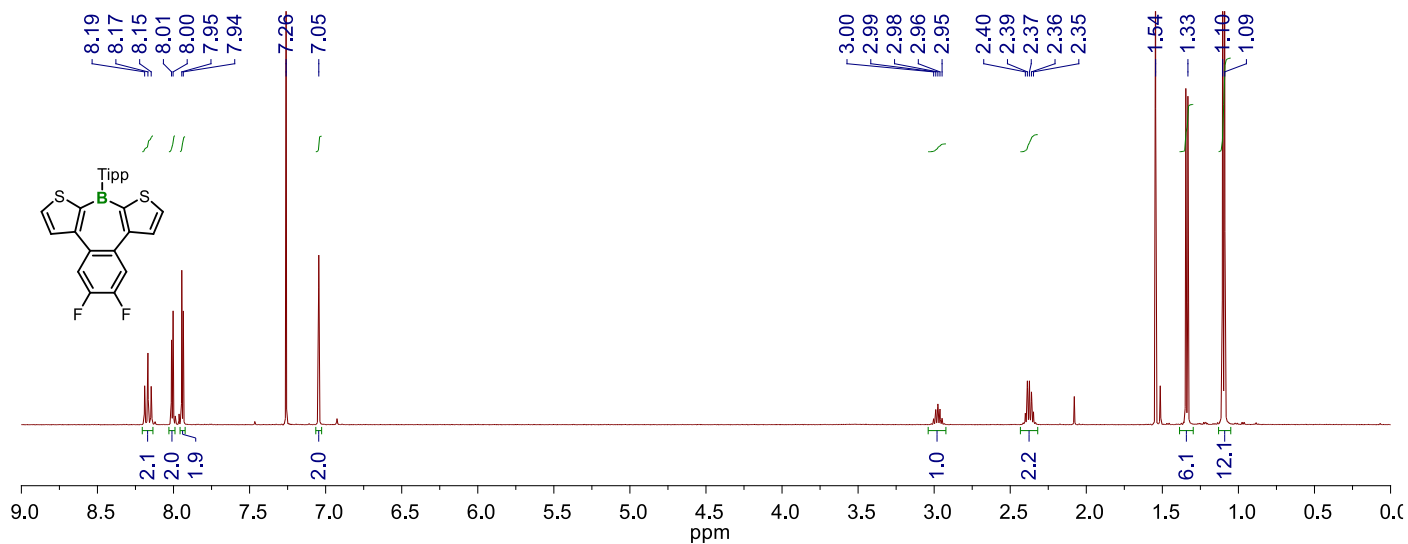

**Figure S33** <sup>1</sup>H NMR spectrum of F-H-Tipp in CDCl<sub>3</sub> at room temperature (500 MHz).

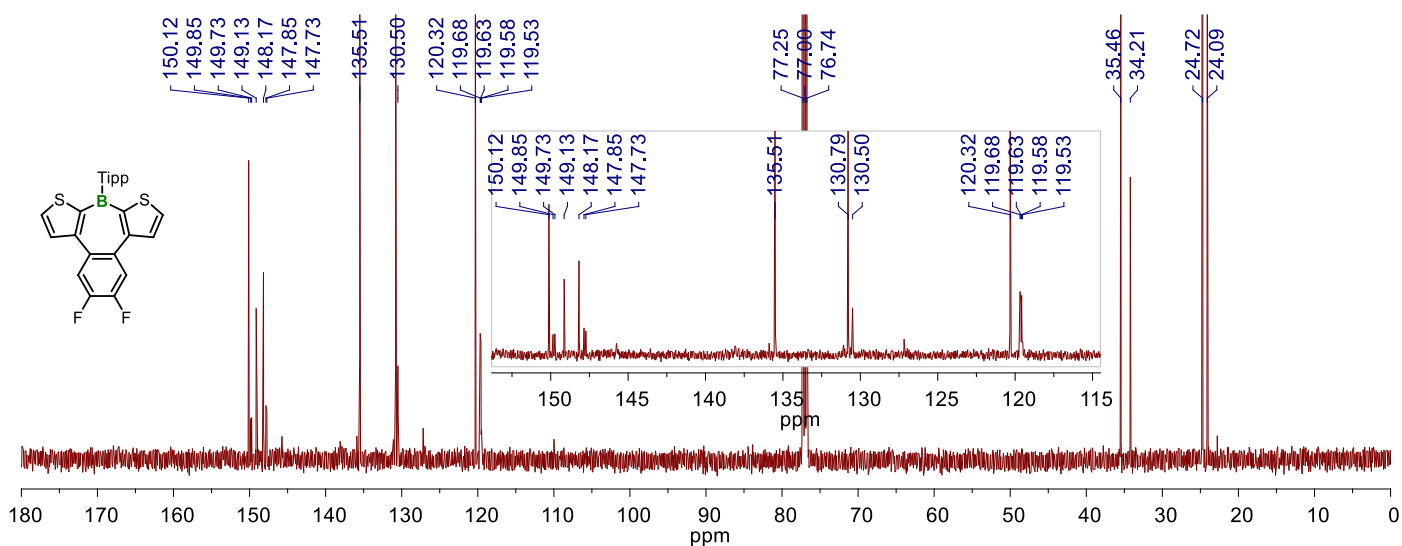

**Figure S34** <sup>13</sup>C NMR spectrum of F-H-Tipp in CDCl<sub>3</sub> at room temperature (126 MHz).

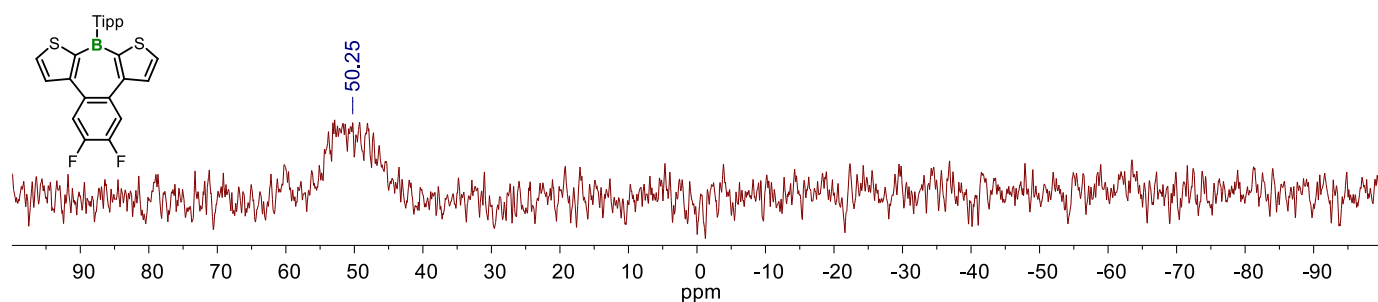

**Figure S35** <sup>11</sup>B NMR spectrum of F-H-Tipp in CDCl<sub>3</sub> at room temperature (160 MHz).

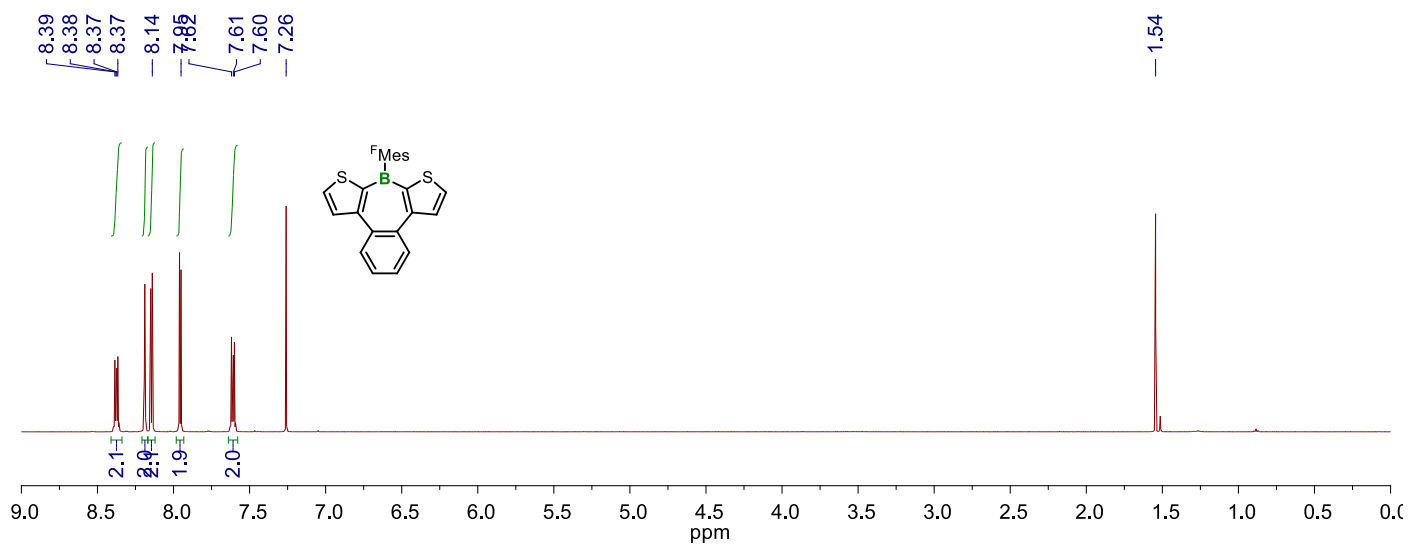

**Figure S36** <sup>1</sup>H NMR spectrum of **H-H-FMes** in CDCl<sub>3</sub> at room temperature (500 MHz).

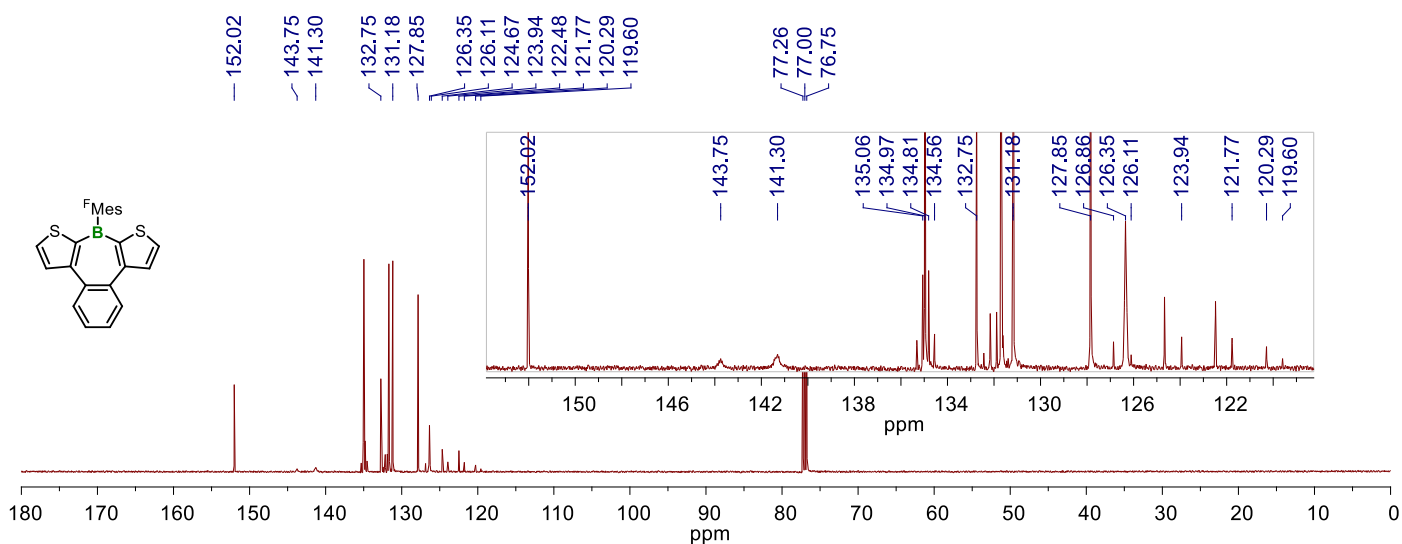

**Figure S37** <sup>13</sup>C NMR spectrum of **H-H-FMes** in CDCl<sub>3</sub> at room temperature (126 MHz).

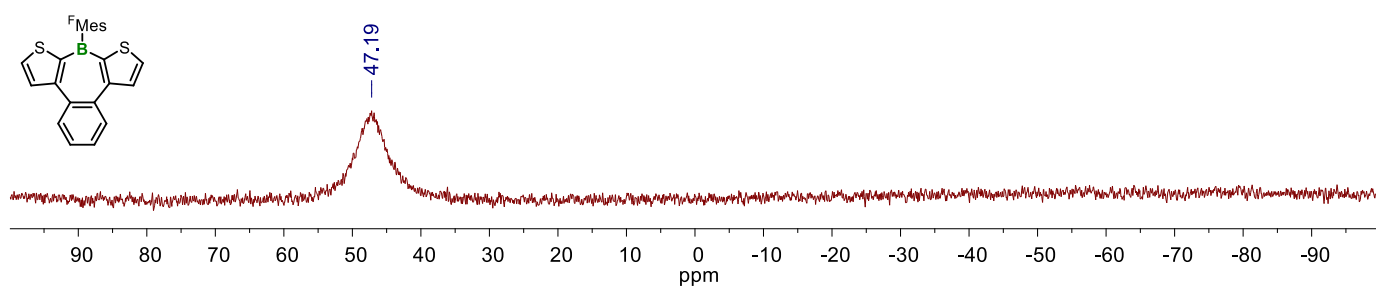

**Figure S38** <sup>11</sup>B NMR spectrum of **H-H-FMes** in CDCl<sub>3</sub> at room temperature (160 MHz).



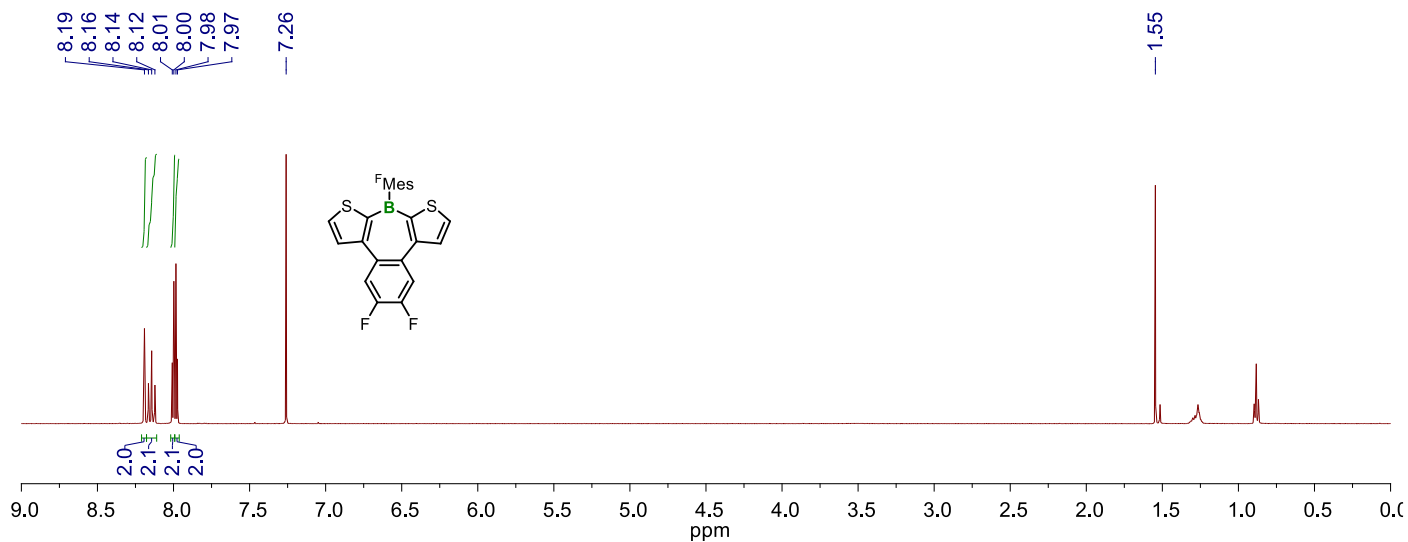

**Figure S39**  $^1\text{H}$  NMR spectrum of **F-H-FMes** in  $\text{CDCl}_3$  at room temperature (500 MHz).

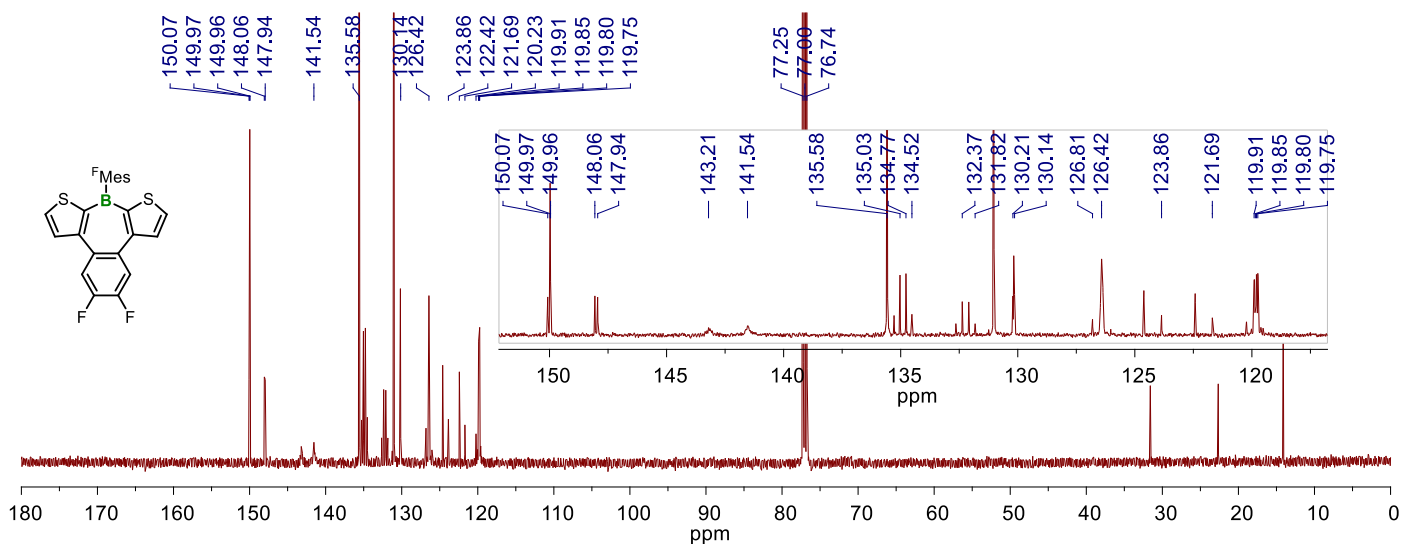

**Figure S40**  $^{13}\text{C}$  NMR spectrum of **F-H-FMes** in  $\text{CDCl}_3$  at room temperature (126 MHz).

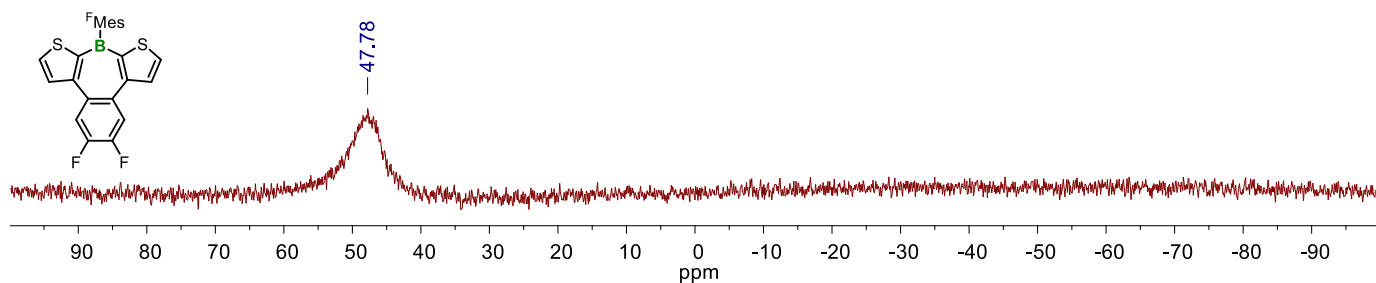

**Figure S41**  $^{11}\text{B}$  NMR spectrum of **F-H-FMes** in  $\text{CDCl}_3$  at room temperature (160 MHz).
